1        ***Pseudomonas aeruginosa* biofilms display carbohydrate**  
2        **ligands for CD206 and CD209 that interfere with their**  
3        **receptor function**

4        Sonali Singh<sup>a,1</sup>, Yasir Almuhanha<sup>a,b,1</sup>, Mohammad Y. Alshahrani<sup>a,c</sup>, Douglas Lowman<sup>d</sup>, Peter  
5        J. Rice<sup>e</sup>, Chris Gell<sup>a</sup>, Zuchao Ma<sup>d</sup>, Bridget Graves<sup>d</sup>, Darryl Jackson<sup>a</sup>, Kelly Lee<sup>a</sup>, Rucha  
6        Kelkar<sup>a</sup>, Janice Koranteng<sup>a</sup>, Dan Mitchell<sup>f</sup>, Ana da Silva<sup>a</sup>, Farah Hussain<sup>a</sup>, Gokhan Yilmaz<sup>g</sup>,  
7        Francesca Mastrotto<sup>a,g,h</sup>, Yasuhiko Irie<sup>a,i</sup>, Paul Williams<sup>a,j,k</sup>, David Williams<sup>d</sup>, Miguel  
8        Camara<sup>a,j,k,2</sup> and Luisa Martinez-Pomares<sup>a,k,2</sup>

9

10        <sup>a</sup> School of Life Sciences, Faculty of Medicine and Health Sciences, University of Nottingham,  
11        Nottingham, NG7 2RD, UK

12        <sup>b</sup> Department of Clinical Laboratory Sciences, College of Applied Medical Sciences, Shaqra  
13        University, P.O. Box 33, Shaqra, 11961, Saudi Arabia

14        <sup>c</sup> Current address: Department of Clinical Laboratory Sciences, College of Applied Medical  
15        Sciences, King Khalid University, P.O. Box 61413, Abha, 9088, Saudi Arabia

16        <sup>d</sup> Department of Surgery, Center of Excellence in Inflammation, Infectious Disease and  
17        Immunity, Quillen College of Medicine, East Tennessee State University, Johnson City,  
18        Tennessee 37614. USA

19        <sup>e</sup> University of Colorado Skaggs School of Pharmacy and Pharmaceutical Sciences, University  
20        of Colorado Anschutz Medical Campus, 12850 East Montview Boulevard C238, Aurora, CO  
21        80045, USA

22        <sup>f</sup> WMS - Translational Medicine, University of Warwick, Coventry, CV4 7AL, UK

23        <sup>g</sup> School of Pharmacy, University of Nottingham. Nottingham. NG7 2RD, UK

24        <sup>h</sup> Current address: Department of Pharmaceutical and Pharmacological Sciences, University  
25        of Padova, via F. Marzolo 5, 35131, Padova, Italy

26        <sup>i</sup> Institute of Technology, University of Tartu, Nooruse 1, Tartu 50411, Estonia

27        <sup>j</sup> National Biofilms Innovation Centre, University of Nottingham, UK

28        <sup>k</sup> University of Nottingham Biodiscovery Institute, Nottingham NG7 2RD

29

30 <sup>1</sup> SS and YA contributed equally to this work.

31

32 <sup>2</sup>To whom correspondence may be addressed: Luisa Martinez-Pomares e-mail:

33 [luisa.m@nottingham.ac.uk](mailto:luisa.m@nottingham.ac.uk) or Miguel Camara e-mail: [miguel.camara@nottingham.ac.uk](mailto:miguel.camara@nottingham.ac.uk)

34

35 **Running title:** Binding of C-type lectin receptors to bacterial biofilms.

36 **Key words:** biofilms, carbohydrates, lectin receptors, mannose receptor, DC-SIGN,

37 *Pseudomonas aeruginosa*

38

39

## 40 **Abstract**

41 Bacterial biofilms represent a challenge to the healthcare system because of their resilience  
42 against antimicrobials and immune attack. Biofilms consist of bacterial aggregates embedded  
43 in an extracellular polymeric substance (EPS) composed of carbohydrate polymers, nucleic  
44 acids and proteins. Carbohydrates within *P. aeruginosa* biofilms include neutral and mannose-  
45 rich Psl, and cationic Pel composed of *N*-acetyl-galactosamine and *N*-acetyl-glucosamine.  
46 Here we show that *P. aeruginosa* biofilms display ligands for the C-type lectin receptors  
47 mannose receptor (MR, CD206) and Dendritic Cell-Specific Intercellular adhesion molecule-  
48 3-Grabbing Non-integrin (DC-SIGN, CD209). Binding of MR and DC-SIGN to *P. aeruginosa*  
49 biofilms is carbohydrate- and calcium-dependent and extends to biofilms formed by clinical  
50 isolates. Confocal analysis of *P. aeruginosa* biofilms shows abundant DC-SIGN ligands  
51 among bacteria aggregates while MR ligands concentrate into discrete clusters. DC-SIGN  
52 ligands are also detected in planktonic *P. aeruginosa* cultures and depend on the presence of  
53 the common polysaccharide antigen. Carbohydrates purified from *P. aeruginosa* biofilms are  
54 recognised by DC-SIGN and MR; both receptors preferentially bind the high molecular weight  
55 fraction (HMW; >132,000Da) with  $K_D$ s in the nM range. HMW preparations contain 74.9-80.9%  
56 mannose, display  $\alpha$ -mannan segments and alter the morphology of human dendritic cells  
57 without causing obvious changes in cytokine responses. Finally, HMW interferes with the  
58 endocytic activity of cell-associated MR and DC-SIGN. This work identifies MR and DC-SIGN  
59 as receptors for bacterial biofilms and highlights the potential for biofilm-associated  
60 carbohydrates as immunomodulators through engagement of C-type lectin receptors.

61

## 62 **Author Summary**

63 Selective engagement of pattern recognition receptors during infection guides the decision-  
64 making process during induction of immune responses. This work identifies mannose-rich  
65 carbohydrates within bacterial biofilms as novel molecular patterns associated with bacterial  
66 infections. *P. aeruginosa* biofilms and biofilm-derived carbohydrates bind two important lectin  
67 receptors, MR (CD206) and DC-SIGN (CD209), involved in recognition of self and immune  
68 evasion. Abundance of MR and DC-SIGN ligands in the context of *P. aeruginosa* biofilms  
69 could impact immune responses and promote chronic infection.

70

## 71 Introduction

72 *Pseudomonas aeruginosa* is a versatile opportunistic pathogen that causes acute infection  
73 after invasive procedures and burns, and chronic infections in patients with persistent lung  
74 disease and compromised immunity (1). *P. aeruginosa* infection is especially troublesome in  
75 people with cystic fibrosis where it is a major determinant of irreversible loss of lung function  
76 and mortality (2, 3). Niches created by hospital procedures such as the use of catheters and  
77 implants as well as contact lenses are effectively colonised by *P. aeruginosa* which exploits  
78 an armoury of cell-associated and secreted virulence determinants that facilitate invasion and  
79 establishment of infection (4). Transition from planktonic to sessile growth and biofilm  
80 development are central to *P. aeruginosa* pathogenesis (1, 4, 5). Biofilms contribute to *P.*  
81 *aeruginosa* persistence by increasing tolerance to anti-microbial agents and immune defences  
82 (1). Within such bacterial communities, the cells are embedded within an extracellular  
83 polymeric substance (EPS) matrix composed of carbohydrates, nucleic acids and proteins (6,  
84 7). *P. aeruginosa* produces three major carbohydrates: Psl, Pel and alginate, with Psl and Pel  
85 playing major roles in biofilm formation in a strain-dependent manner (6-8). Psl is neutral and  
86 mannose-rich (9). Pel is cationic and largely composed of *N*-acetyl-galactosamine and *N*-  
87 acetyl-glucosamine (10). Here we tested the hypothesis that *P. aeruginosa* biofilms could  
88 directly engage lectin receptors expressed by immune cells. In particular, the high mannose  
89 content of Psl suggested potential binding to mannose-binding C-type lectin receptors (CLRs)  
90 such as mannose receptor (MR, CD206) (11) and Dendritic Cell-Specific Intercellular  
91 adhesion molecule-3-Grabbing Non-integrin (DC-SIGN, CD209) that are predominantly  
92 expressed by selected populations of macrophages and dendritic cells (MR and DC-SIGN)  
93 and non-vascular endothelium (MR) (11, 12). The roles ascribed to these molecules are  
94 numerous and include promotion of antigen presentation and modulation of cellular activation  
95 (11, 12). MR contains two independent carbohydrate-binding domains, the cysteine-rich  
96 domain (MR-CR) and the C-type lectin-like domains (MR-CTLD4-7) that recognise sulfated  
97 and mannosylated sugars, respectively (11). DC-SIGN binds to high mannose structures and  
98 blood type Lewis antigens through its extracellular region (12). Here we demonstrate that MR  
99 and DC-SIGN ligands are present within *P. aeruginosa* biofilms. Distinct binding pattern of  
100 both lectins highlights the heterogeneity of carbohydrate structures within the biofilm structure.  
101 In addition, DC-SIGN recognises ligands in planktonic *P. aeruginosa* cultures that depend on  
102 the presence of the common polysaccharide antigen (13). Carbohydrates purified from biofilm  
103 cultures, particularly high molecular weight species, bind MR and DC-SIGN and interfere with  
104 their endocytic activity. These results demonstrate the capacity of *P. aeruginosa* biofilm-  
105 associated carbohydrates to engage immune receptors and suggest an active role for these  
106 structures in modulating the immune responses to biofilms.

107 **Results**

108 ***P. aeruginosa* biofilms display DC-SIGN and MR ligands**

109 The mannose-rich nature of carbohydrates produced by *P. aeruginosa* biofilms (9) suggested  
110 the possibility of immune mannose-specific lectins recognising these structures. We tested  
111 whether the lectins MR and DC-SIGN bound *P. aeruginosa* biofilms by analysing the  
112 interaction of recombinant Fc chimeric molecules DC-SIGN-Fc and MR-CTLD4-7-Fc (14) to  
113 biofilms generated in 96 well plates as described in Materials and Methods. Both DC-SIGN  
114 and MR-CTLD4-7 bound to *P. aeruginosa* PAO1 biofilms and DC-SIGN displayed higher  
115 binding compared to MR (Figure 1A). Inhibition assays using selected monosaccharides,  
116 confirmed that MR and DC-SIGN binding to PAO1 biofilms is carbohydrate-dependent and  
117 preferentially inhibited by mannose and fucose, in agreement with the sugar specificity  
118 previously shown for both lectins (Figure 1A), and Ca<sup>2+</sup>-dependent (Figure 1B), as expected  
119 for these C-type lectins (11, 12). Recognition by MR and DC-SIGN was not restricted to  
120 biofilms generated by PAO1 and extends to biofilms generated by wound clinical isolates (CW  
121 2, CW3, CW5-B, CW5-S, CW6 and CW7). This strain collection comprised isolates collected  
122 from bone (CW2 and CW5-B), wound tissue (CW3, CW6 and CW7) and blood (CW5-S) and  
123 two serotypes (13)(CW2, CW3, CW5 and CW6 are serotype O6) and CW7 is part of the  
124 serotype O5 cluster, which includes O5, O18, and O20 serotypes. Sequence analysis  
125 confirmed presence of the *psl* operon (8) in all isolates although point mutations could alter  
126 the levels and structure of the carbohydrate (Figure S1). DC-SIGN and MR-CTLD4-  
127 7 binding to biofilms formed by clinical isolates follows a similar pattern to that found for PAO1,  
128 i.e. increased binding by DC-SIGN compared to MR (Figure 1C).

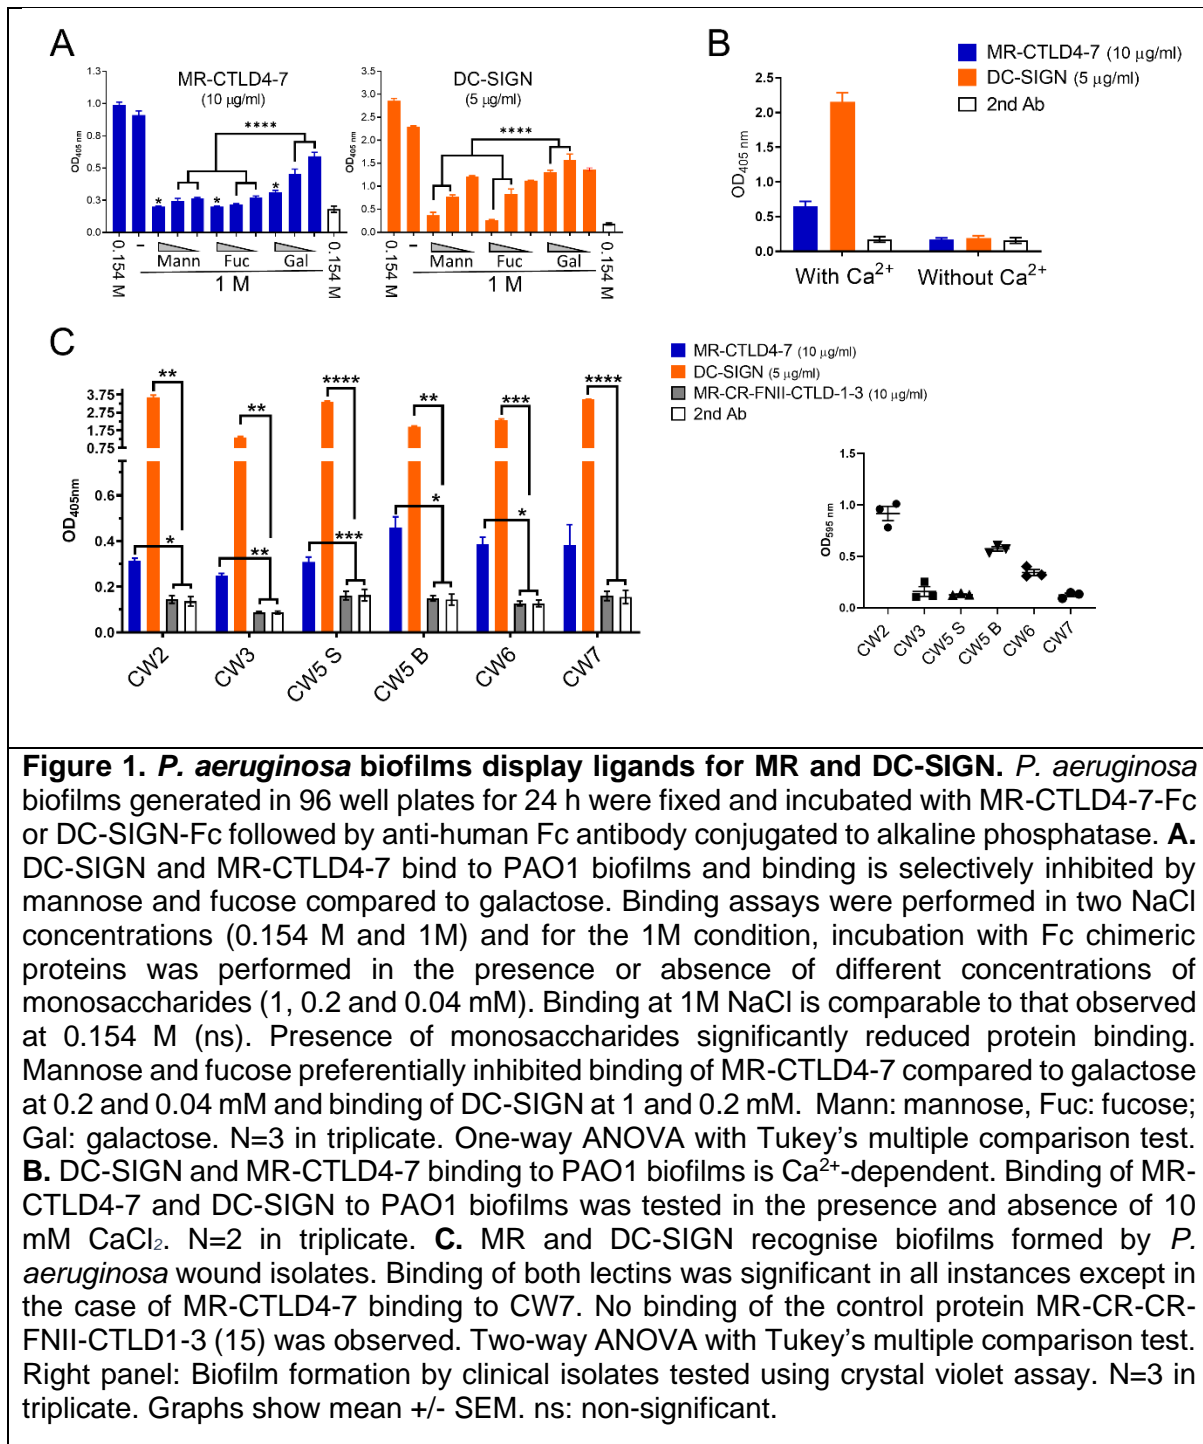

129

130

131 **Distinct distribution of DC-SIGN and MR ligands within PAO1 biofilms**

132 Confocal analysis of DC-SIGN and MR-CTLD4-7 ligands within PAO1 biofilms generated  
133 under flow conditions (Figure S2) unveiled unique ligand distribution for both lectins (Figure  
134 2). In accordance with the strong binding detected using ELISA-based assays (Figure 1) DC-  
135 SIGN ligands within biofilms were widely distributed and particularly abundant between  
136 bacteria aggregates with some areas displaying substantial ligand density (Figure 2 top panel;  
137 Video S1). MR-CTLD4-7 ligands within *P. aeruginosa* biofilms were less abundant and  
138 displayed a granular distribution forming clusters located both among and on bacteria  
139 aggregates (Figure 2, bottom panel; Video S2).

140

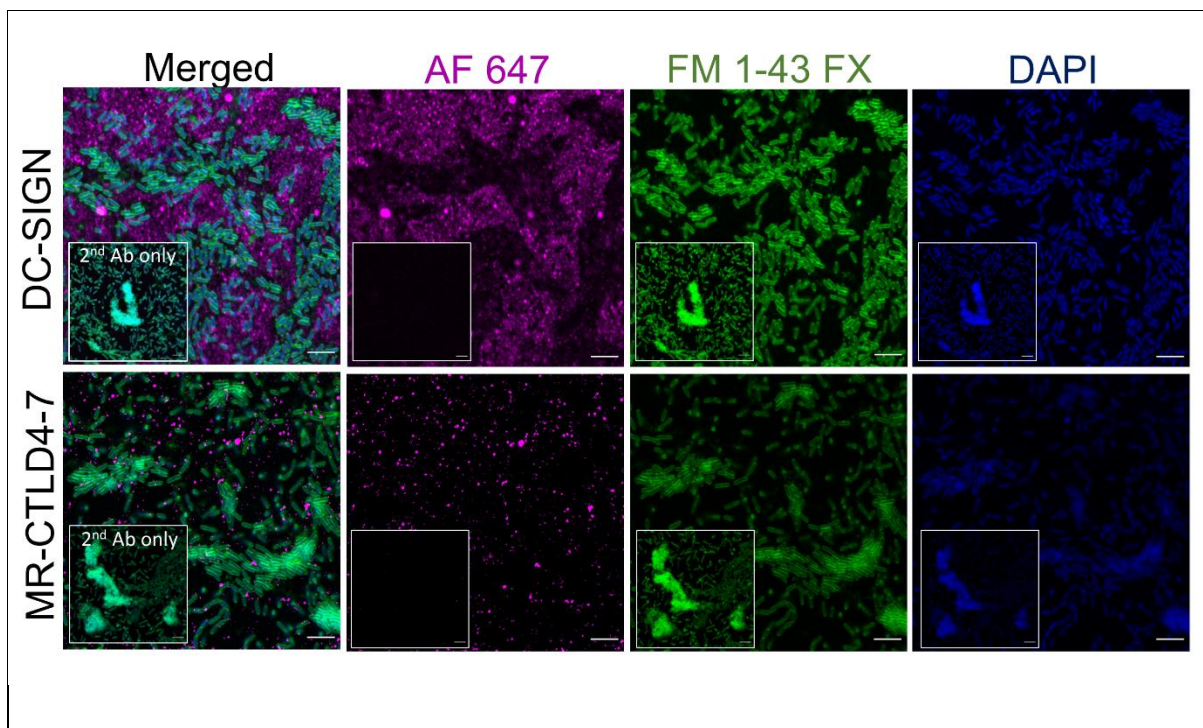

**Figure 2. Distribution of MR and DC-SIGN ligands in *P. aeruginosa* biofilms.** PAO1 biofilms generated under flow conditions for 18h as described in Figure S2 were incubated with DC-SIGN and MR-CTLD4-7 Fc-chimeric proteins followed by anti-human Fc-secondary antibody conjugated to Alexa 647 (magenta) and counterstained with DAPI (DNA, blue) and FM1-43FX (bacteria, green). Z-stacks were acquired for all samples using confocal microscopy (see videos S1 and S2). The top panels show slice 9 for DC-SIGN, and 12 for corresponding secondary Ab control (insets) and bottom panels slice 12 for MR-CTLD4-7 and its control (insets). The same settings for image acquisition and processing were maintained for test and control samples (Videos S3 and S4). Inset shows signal with biofilms incubated with secondary antibody only. No specific labelling was seen with MR-CR-FNII-CTLD1-3 Fc chimeric protein (video S5). Size bar 4  $\mu\text{m}$ .

141

142

### 143 DC-SIGN binds to planktonic *P. aeruginosa*

144 Further analysis of DC-SIGN and MR binding to *P. aeruginosa* biofilms using ELISA-based  
 145 assays identified binding of DC-SIGN to biofilms generated by the Psl-deficient mutant  $\Delta wspF$   
 146  $\Delta psl$  (16)(Table 1); this mutant is not expected to contain mannose-rich carbohydrates. The  
 147  $\Delta wspF$  background confers constitutive high levels of cyclic-di-GMP, overproduces Psl and  
 148 promotes biofilm formation; a phenotype that resembles that of small rough colony variants  
 149 found during chronic infection (17). MR-CTLD4-7 displays reduced binding to  $\Delta wspF \Delta psl$   
 150 biofilms indicating that the *psl* operon is likely responsible for the generation of MR-CTLD4-7  
 151 ligands (Figure 3A). We investigated the possibility of DC-SIGN interacting with planktonic  
 152 cells, which could account for binding to biofilms in the absence of Psl. DC-SIGN binds  
 153 planktonic *P. aeruginosa* cultures and binding was independent of Psl and/or Pel (Figure 3B).  
 154 MR-CTLD4-7 did not bind planktonic PAO1. *P. aeruginosa* produces two forms of O antigen;  
 155 a homopolymer of D-rhamnose trisaccharide repeats named common polysaccharide antigen  
 156 (CPA) or A band, and a heteropolymer that consists of repeating units of three to five distinct  
 157 sugars named as O-specific antigen (OSA) or B band (13). Deletions in *wbpM*, *rmd* or *wbpL*  
 158 in PAO1 causes loss of CPA, OSA, or both, respectively (18). Binding of planktonic *P.*  
 159 *aeruginosa* to DC-SIGN required expression of *rmd* or *wbpL* (Figure 3C) suggesting the  
 160 requirement for CPA LPS and a broader role for DC-SIGN, compared to MR, in the recognition  
 161 of *P. aeruginosa* infection.

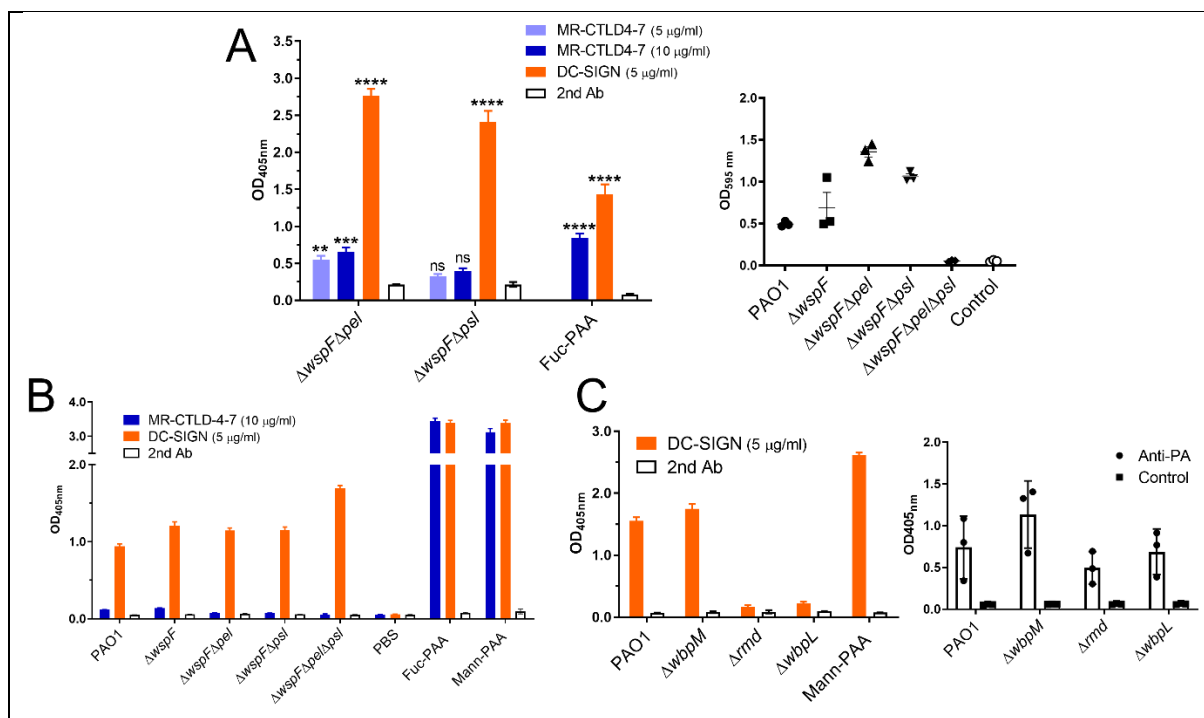

**Figure 3. DC-SIGN binds to *P. aeruginosa* biofilms and planktonic cells. A.** Binding of MR-CTLD4-7 but not DC-SIGN to PAO1 biofilms depends on the presence of the *psl* operon. Biofilms formed by  $\Delta wspF \Delta pel$  (Psl+/Pel-) or  $\Delta wspF \Delta psl$  (Psl-/Pel+) were generated in 96 well plates for 24 h, fixed and incubated with MR-CTLD4-7-Fc or DC-SIGN-



Fc followed by anti-human Fc antibody conjugated to alkaline phosphatase. Two-way ANOVA with Dunnett's multiple comparison test. N=3 in triplicate. Right panel. Biofilms formation was confirmed using crystal violet assay. **B.** Planktonic cultures of *P. aeruginosa* PAO1 and different mutants were collected, fixed and used to coat wells of MaxiSorp plates. Wells were incubated with MR-CTLD4-7-Fc or DC-SIGN-Fc followed by anti-human Fc antibody conjugated to alkaline phosphatase. DC-SIGN, but not MR, bind planktonic bacteria and binding is independent from the presence of Psl and/or Pel. N=4 in triplicate. **C.** DC-SIGN binding to planktonic bacteria is dependent on presence of CPA LPS which is absent in the  $\Delta rmd$  and  $\Delta wbpL$  mutants. N=3 in triplicate. Man-PAA and Fuc-PAA refer to commercial mannose and fucose polymers. Right panel: Adherence of planktonic cells to the wells was confirmed by ELISA using an antibody against *P. aeruginosa* (Anti-PA). N=3 in triplicate. Graphs show mean +/- SEM.

162

## 163 MR and DC-SIGN bind to carbohydrates produced by *P. aeruginosa* biofilms

164 To determine whether mannose-rich sugars from *P. aeruginosa* biofilms bound MR and DC-SIGN,  
165 SIGN, carbohydrates from cultures of the Pel-deficient mutant  $\Delta wspF \Delta pel$  (Table 1) were  
166 purified as described (19). Two preparations generated independently, 1 and 2, were divided  
167 into high (>45 kDa, HMW) and low molecular weight (<45 kDa, LMW) by gel filtration  
168 chromatography based on protein standards (19). Gel permeation chromatography (GPC)  
169 confirmed differences in size (15,370 Da for LMW-1 and 182,300 Da and 132,670 Da, for  
170 HMW1 and HMW-2, respectively. LMW-2 was not investigated) (Figure 4A). A substantial  
171 amount of the material in all the samples (~33 – 40% of the total mass) eluted with the included  
172 volume. In our system, this means compounds with low MW, i.e. 1000 Da. Their nature is  
173 unknown, but we propose that they could be carbohydrate breakdown products. No major  
174 protein or DNA contamination were detected based on Silver (Figure S3) and Coomassie  
175 staining, protein quantification and spectrophotometry (data not shown). DC-SIGN and MR-  
176 CTLD4-7 bind to HMW and LMW preparations (Figure 4B and C) but binding to HMW was  
177 stronger. In contrast to their biofilm binding ability, MR-CTD4-7 and DC-SIGN bind similarly to  
178 both HMW preparations.

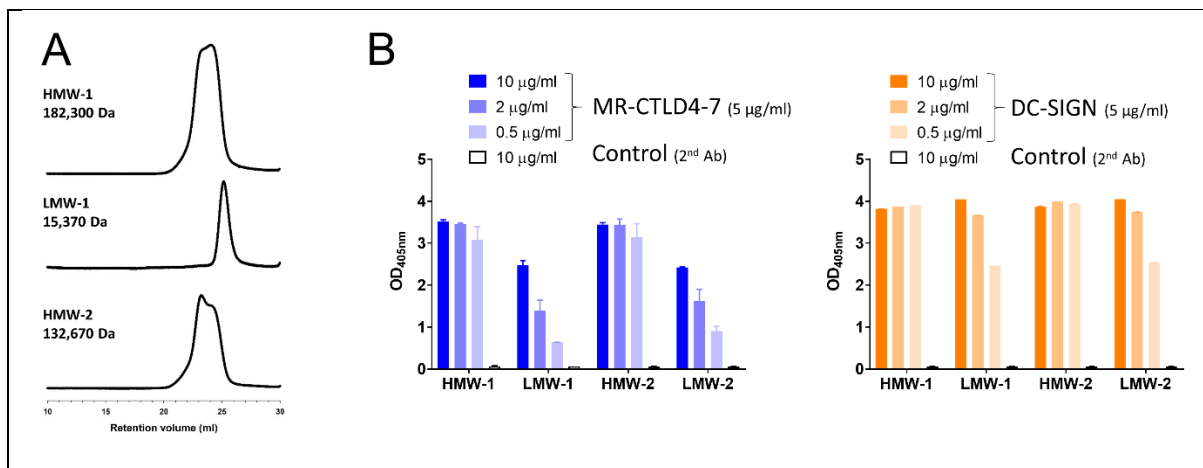

**Figure 4. Size analysis and binding to DC-SIGN and MR-CTLD4-7 of *P. aeruginosa* biofilm-associated carbohydrate.** **A.** GPC analysis of HMW-1, LMW-1 and HMW-2 confirms successful fractionation into high and low MW forms. HMW-2 contained two peaks poorly resolved. This indicates that this sample is comprised of two components that are similar in MW and perhaps conformation. The MW for HMW-2 reflects the average MW for the entire sample. **B.** Lectin binding assays demonstrate binding of MR-CTLD4-7 and DC-SIGN to HMW-1, LMW-1, HMW-2 and LMW-2. Robust binding of HMW-1 and 2 was observed at 0.5 µg/ml while binding of LMW-1 and 2 at this concentration was substantially reduced. Dose-dependent binding of HMW-1 and HMW-2 to MR-CTLD4-7 and DC-SIGN occurs at lower doses (Figure S4). Fc-chimeric proteins and anti-human Fc-secondary antibody conjugated to alkaline phosphatase were used. Graphs show mean ± SEM of 2 independent repeats done in duplicate.

179

180 Initial  $^1\text{H-NMR}$  analysis indicated increased level of impurities in LMW-1 compared to HMW-1  
 181 and HMW-2 (data not shown), hence further work largely focused on HMW preparations. The  
 182 hydrolysed carbohydrate monomer compositions in weight % for HMW-1 is 74.9% mannose,  
 183 14.7% glucose, 7.4% galactose, and 3.0% rhamnose and for HMW-2 80.9% mannose, 11.0%  
 184 glucose, 2.3% galactose, and 5.7% rhamnose. The  $^1\text{H-NMR}$  spectra of HMW-1 and HMW-2  
 185 are very similar (Figure 5A) and show that, mannose, the major monomer present, arose from  
 186 mannan segments in the polymer (Figure S5) (20). The mannose-rich composition of HMW  
 187 preparations agrees with previous findings (9) and is supported by its recognition by  
 188 *Hippeastrum Hybrid Amaryllis* (HHA) lectin (Figure 5B) commonly used to detect the  
 189 mannose-rich carbohydrate Psl within *P. aeruginosa* biofilms (21). Binding of DC-SIGN and  
 190 MR to HMW-2 was further confirmed using bio-layer interferometry and purified full-length  
 191 human MR and biotinylated tetrameric DC-SIGN (22). Analysis of the binding kinetics revealed  
 192 that both receptors bound HMW-2 with  $K_D$ s in the nM range (Figure 5C).

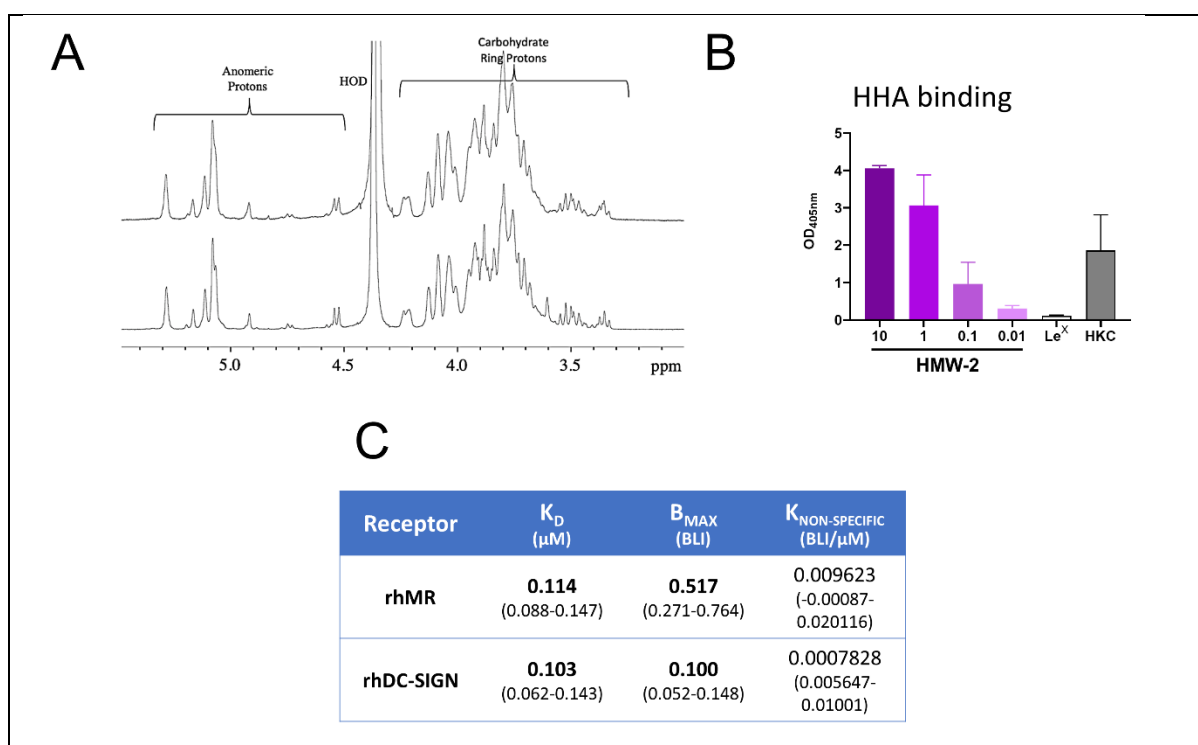

**Figure 5. Characterisation of high molecular weight biofilm carbohydrates.** **A.**  $^1\text{H-NMR}$  spectra from HMW-1 (top) and HMW-2 (bottom) demonstrate that they are very similar and contain primarily carbohydrates composed of  $\alpha(1-6)$  linked mannose segments. **B.** HMW-2 is recognised by the mannose-specific lectin HHA in a lectin binding assay. HHA recognises both (1-3) and (1-6)  $\alpha$ -linked mannose structures. LPS-free HMW-2 (Figure S3) and HHA conjugated to alkaline phosphatase were used in these assays. Lewis<sup>x</sup>-PAA and Heat-Killed *Candida albicans* (HKC) were negative and positive controls, respectively. Graph shows Mean  $\pm$  SEM of two independent repeats done in duplicate. **C.** HMW-2 binds rhDC-SIGN and rhMR. Tetrameric hDC-SIGN, biotinylated and immobilised on a streptavidin sensor and rhMR immobilised on a Ni-sensor were incubated with different HMW-2 concentrations. The table shows equilibrium dissociation constants for the receptor ligand interaction in  $\mu\text{M}$  ( $K_D$ ); receptor density on the biosensor surface ( $B_{MAX}$ ) and non-specific binding ( $K_{NON-SPECIFIC}$ ). 95% Confidence intervals in  $\mu\text{M}$  are shown within brackets.

194 **Effect of biofilm carbohydrate on human dendritic cells**

195 Following on previous findings, we next explored the possibility of the mannose-rich HMW  
196 biofilm carbohydrate preparations altering the phenotype of human moDCs (MR<sup>+</sup>, DC-SIGN<sup>+</sup>  
197 cells, Figure S6). However, silver staining of HMW-1 and HMW-2 highlighted substantial  
198 endotoxin contamination (Figure S3A). Accordingly, HMW-1 and HMW-2 induced high levels  
199 of TNF- $\alpha$  by moDCs that were reduced in the presence of polymyxin B. In addition, the pattern  
200 of cytokines produced by moDCs in response to HMW-2 was indistinguishable from that of  
201 purified endotoxin based on a cytokine microarray assay (Data not shown). LPS removal from  
202 HMW-2 was achieved using an endotoxin removal column and confirmed using SDS-PAGE  
203 (Figure S3B) and toll-like receptor 4-reporter cells (Data not shown). LPS-free HMW-1 and  
204 HMW-2 both retained the ability to bind DC-SIGN and MR-CTLD4-7 (Figure S3C). LPS-free  
205 HMW-2 (10, 1, 0.1  $\mu$ g/ml) in isolation did not induce cytokine production by moDCs nor  
206 modified the response of moDCs to purified *E. coli* LPS (Figures S7 and S8). Similarly, LPS-  
207 free HMW-2 did not affect the cytokine response of moDCs to  $\Delta wspF \Delta psl$  biofilms or  $\Delta wspF$   
208  $\Delta psl \Delta pel$  cultures (Figure S9). To establish whether HMW-2 modulated other aspects of  
209 moDCs biology, we investigated morphological changes in moDCs and DC-SIGN surface  
210 distribution after incubation on HMW-2-coated surfaces. Both HMW-2 and LPS-free HMW-2  
211 were tested. moDCs cultured on LPS-free HMW-2 for 24 h display a rounder morphology,  
212 characterised by an increased circularity index and reduced perimeter (Figure 6), suggesting  
213 changes in the cytoskeleton related to maturation state. These morphological changes were  
214 less apparent when using crude HMW-2 indicating that LPS can partially reverse this effect.  
215 Analysis of DC-SIGN surface expression showed reduced DC-SIGN labelling (Raw Integrated  
216 Density) in cells cultured in the presence of HMW-2 (both crude and LPS-free preparations).  
217 When adjusting for cell perimeter (Signal per Unit Area), only the LPS-containing samples  
218 showed reduced surface DC-SIGN labelling which is compatible with a more classical moDC  
219 activation (23). These findings support the ability of biofilm-associated carbohydrates to  
220 influence moDC function in the absence of LPS.

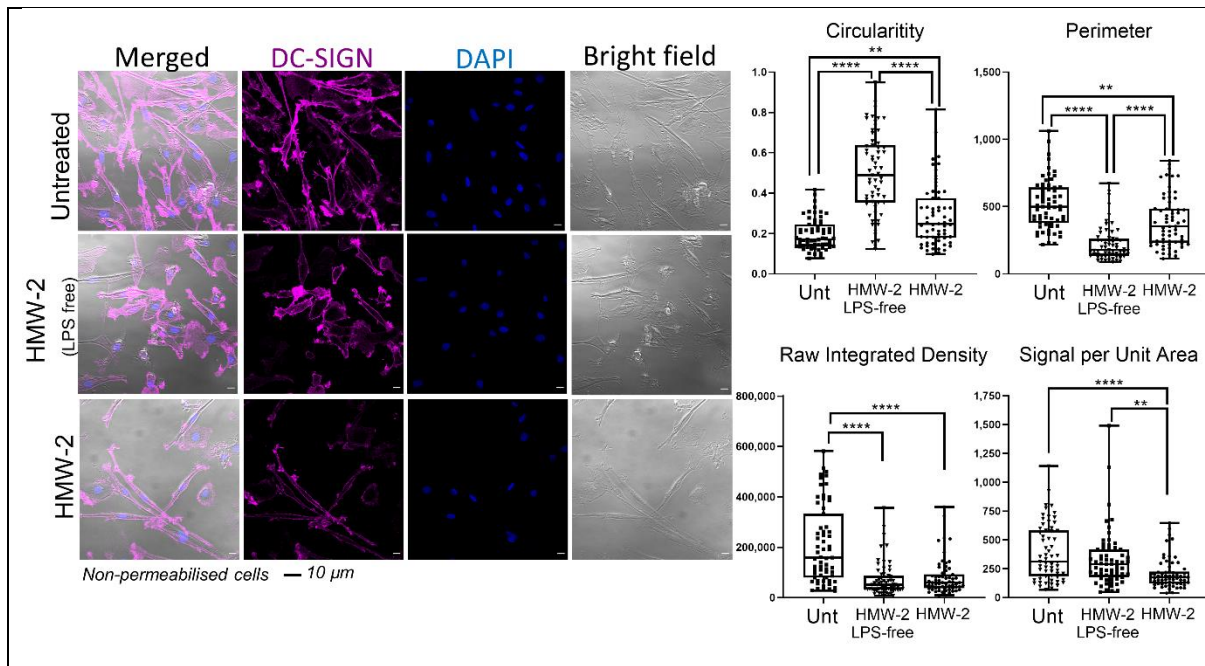

**Figure 6. Changes in human dendritic cell morphology in the presence of biofilm-associated carbohydrate.** HMW-2 (with and without LPS contamination) diluted in X-vivo-15 (10 μg/ml) were used to coat chambers of μ-slide VI 0.4 flow slides over night at 4°C. moDCs were added ( $5 \times 10^5$  cells per channel) and incubated for 24 h. Samples were then fixed and stained for DC-SIGN (magenta) and nucleus (DAPI, blue). The figure shows representative images from unpermeabilised samples. Permeabilised samples, including secondary antibody control are shown in Figure S10. Cells were analysed for changes in shape (Circularity Index), size (Perimeter) and DC-SIGN labelling intensity (Raw Integrated Density and Signal per Unit Area). Data derive from 3 independent experiments, 20 cells per experiment were analysed. Statistical significance assessed using Kruskal-Wallis test corrected for multiple comparison using a Dunn's multiple comparison test.

221

222

223

224 **Mannose-rich biofilm carbohydrate interferes with the function of cell-associated DC-**  
225 **SIGN and MR**

226 MR and DC-SIGN are important endocytic receptors expressed by antigen presenting cells.  
227 Therefore, in a different set of experiments we tested whether HMW-1 and HMW-2 could  
228 interfere with their endocytic activities. moDCs internalise fucose-PAA-FITC (model ligand for  
229 MR and DC-SIGN), Lewis<sup>x</sup>-PAA-FITC (model ligand for DC-SIGN) and, poorly, galactose-  
230 PAA-FITC (not recognised by MR or DC-SIGN). Presence of HMW-1 and HMW-2 (crude  
231 preparations) partially inhibits uptake of Lewis<sup>x</sup>-PAA-FITC but not that of fucose-PAA-FITC or  
232 galactose-PAA-FITC by moDCs (Figure 7A). These findings were not affected by Polymyxin  
233 B (100 µg/ml) (Figure S11) suggesting that these observations are LPS-independent. These  
234 results indicate specific ability of HMW-1 and HMW-2 to modulate DC-SIGN-mediated  
235 endocytosis in moDCs. We next employed cell lines expressing either DC-SIGN (U937-DC-  
236 SIGN) or MR (CHO-MR) to validate these findings. U937-DC-SIGN cells associate with  
237 Lewis<sup>x</sup>-PAA-FITC and fucose-PAA-FITC specifically and HMW-1 and HMW-2 inhibit both  
238 activities (Figure 7B) indicating that biofilm carbohydrates can interact with cell-associated  
239 DC-SIGN and compete with DC-SIGN ligands for binding. CHO-MR internalise fucose-PAA-  
240 FITC and, weakly, Lewis<sup>x</sup>-PAA-FITC (Figure 7C). Uptake of Lewis<sup>x</sup>-PAA by MR was  
241 unexpected as the MR-CTLD4-7 fragment does not bind Lewis<sup>x</sup> in ELISA-based assays (Data  
242 not shown) and this sugar lacks the sulphated moiety required for binding to MR-CR domain  
243 (24). Surface plasmon resonance (SPR) analysis using full length human MR confirmed the  
244 capacity of MR to bind Lewis<sup>x</sup> polymers (Figure S12) supporting that uptake of Lewis<sup>x</sup> by CHO-  
245 MR cells is MR-mediated. HMW-1 and HMW-2 interfere with uptake of Lewis<sup>x</sup>-PAA-FITC, but  
246 not fucose-PAA-FITC, by CHO-MR cells. LPS removal does not affect these findings (Figure  
247 S13). These results suggest that HMW biofilm carbohydrates interfere with uptake of selected  
248 MR ligands, but possibly only those with lower binding avidity. No sugar uptake was observed  
249 in the case of U937 or CHO control cells (Data not shown). Combined these data suggest that  
250 HMW biofilm carbohydrates interfere with MR and DC-SIGN function and unveil the differential  
251 contributions of MR and DC-SIGN to sugar uptake in human moDCs with fucose being  
252 preferentially internalised through MR (not inhibited by HMW biofilm carbohydrates) and  
253 Lewis<sup>x</sup> by DC-SIGN and/or MR (both inhibited by HMW biofilm carbohydrates).

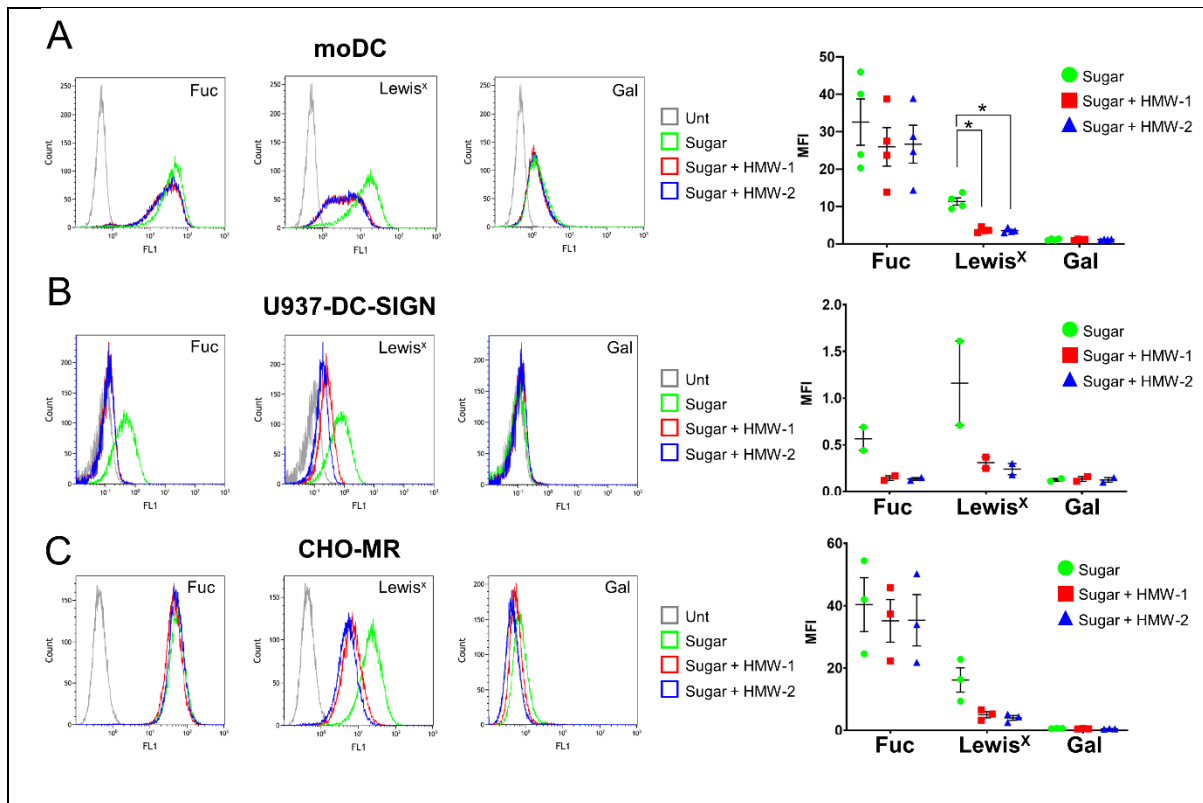

**Figure 7. Inhibition of sugar uptake by MR and DC-SIGN expressing cells by HMW-1 and HMW-2.** Cells were treated with HMW-1 or HMW-2 (10  $\mu$ g/ml) for 1 h, then fluorescently labelled sugars were added for a further 1 h. Association of fluorescent sugars to cells was measured by flow cytometry. Representative histograms and scatter plots depicting mean  $\pm$  SEM of median fluorescence intensity (MFI) are shown for each cell type. **A.** Human moDCs (expressing MR and DC-SIGN) internalise fucose (Fuc), Lewis<sup>x</sup> and galactose (Gal) PAA-FITC polymers but only Lewis<sup>x</sup> uptake is reduced by HMW-1 and HMW-2, N=4. **B.** U937-DC-SIGN cell line (express DC-SIGN, but not MR) internalise fucose and Lewis<sup>x</sup> polymers and their uptake is reduced by HMW-1 and HMW-2, N=2. **C.** CHO-MR cells (express MR, but not DC-SIGN) internalise fucose and Lewis<sup>x</sup> polymers and only Lewis<sup>x</sup> uptake is reduced by HMW-1 and HMW-2, N=3. Repeated-measures ANOVA was performed to determine statistical significance; \*,  $\leq 0.05$ . Fuc: fucose; Gal: galactose.

## 255 Discussion

256 In this study, we demonstrate (i) direct recognition of *P. aeruginosa* biofilms by the C-type  
257 lectin receptors DC-SIGN (CD209) and MR (CD206) and detect CPA-LPS-dependent binding  
258 of DC-SIGN to planktonic PAO1 cells; (ii) describe the composition and structure of HMW  
259 carbohydrate preparations from *P. aeruginosa* biofilms; (iii) show direct binding of DC-SIGN  
260 and MR to biofilm-associated carbohydrates; and (iv) provide evidence for changes in human  
261 DC morphology and DC-SIGN and MR endocytic activity in the presence of biofilm-associated  
262 carbohydrates. The key message of these studies is that, at least under our experimental  
263 conditions, biofilms display carbohydrate ligands for immune C-type lectin receptors that could  
264 contribute to the modulation of immunity towards these structures.

265 Biofilms are major drivers of bacterial pathogenesis in the context of chronic infections.  
266 Historically, protection against immune attack alongside antibiotic tolerance, were postulated  
267 as the key advantages conferred by these biofilms during infection but research into their role  
268 in modulating immunity is gathering momentum (5, 25). In the context of infection, MR and  
269 DC-SIGN are considered promoters of regulatory immune mechanisms designed to curtail  
270 damaging inflammatory processes and MR and/or DC-SIGN binding are viewed as immune  
271 evasion mechanism(s) (11, 12, 26, 27). Neither DC-SIGN or MR display canonical signalling  
272 motifs at their cytosolic domains and instead of triggering cellular responses modulate the  
273 outcomes to stimulation of signalling pattern recognition receptors such as Toll-like receptors  
274 (11, 12, 27). Carbohydrates are molecular patterns not normally associated with bacterial  
275 infections but their abundance in bacterial biofilms necessarily alters this perception. Fungal  
276 pathogens and viruses, together with *Mycobacterium tuberculosis*, display ligands for C-type  
277 lectins and some of their sugar-bearing structures, such as mannan,  $\beta$ -glucan, mannose  
278 patches and lipoarabinomannan, modulate immunity through lectin engagement. Since  
279 biofilms are largely associated with chronic disease, it is plausible to speculate that after initial  
280 infection mediated by planktonic-like cells, a biofilm-like lifestyle could both counterbalance  
281 immune attack while gearing immunity towards non-resolving, ineffective immunity (Figure 8).



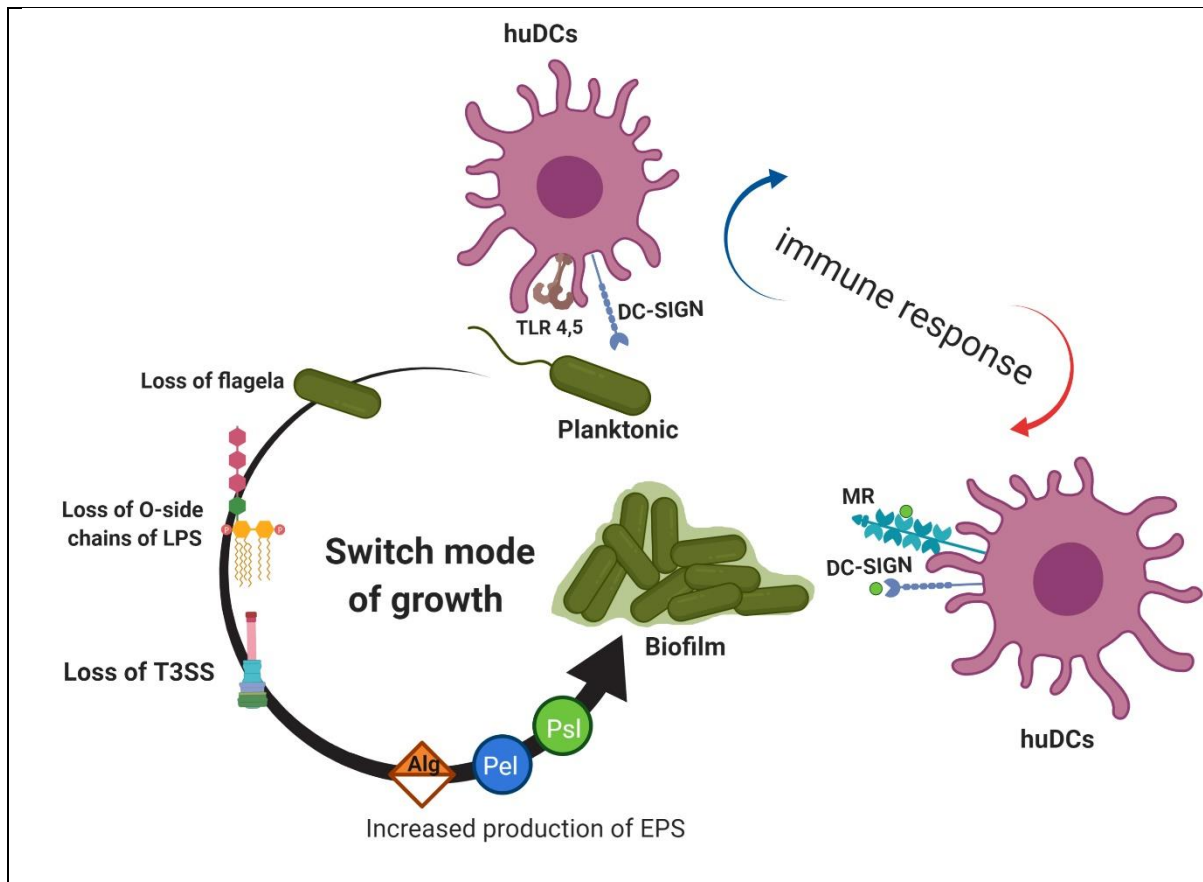

**Figure 8. Role of lectin receptors during *P. aeruginosa* infection.** Planktonic *P. aeruginosa* and biofilms co-exist in the host, with planktonic bacteria primarily associated with acute infections and biofilms with chronic infections. Planktonic bacteria display traits associated with enhanced cytotoxicity (T3SS+) and ability to stimulate immune cells (Flagellin+) and can trigger multiple signalling pathways through engagement of pattern recognition receptors (Toll-like receptors are displayed as example). In this instance DC-SIGN, could modulate cellular activation and lead to upregulation of IL-10 production (as observed in other pathogens). Biofilms engage both DC-SIGN (through biofilm-associated carbohydrate and ligands in planktonic cells) and MR (through biofilm-associated carbohydrates). In addition, biofilm-associated bacterial cells could display reduced ability to cause cytotoxicity and stimulate pattern recognition receptors. In this instance MR and DC-SIGN could modulate an already altered cellular activation likely leading to further modulation of immunity away from pro-inflammatory Th1-dominated responses.

282

283 Both HMW preparations investigated in this study are mannose-rich and contain  $\alpha$ -mannose  
284 segments. Despite the clear differences observed in DC-SIGN and MR binding to whole  
285 biofilms, their comparable binding to purified HMW preparations indicates that the purification  
286 procedure likely selects for common MR and DC-SIGN ligands within the biofilm structure. In  
287 addition there is a possibility for soluble bacterial proteins such as CrdA, shown to reinforce  
288 biofilm structure through Psl binding, to block the MR and/or DC-SIGN binding sites within the  
289 biofilm structure (28). Finally our results agree with work implicating MR as receptor for Slime-  
290 GLP, a crude ethanol extract of *P. aeruginosa* biofilm matrix (29).

291 Binding of DC-SIGN and MR to *P. aeruginosa* biofilms was detected using ELISA-based  
292 assays and confocal microscopy and there was good correlation between both assays with  
293 DC-SIGN binding being more abundant and widely distributed than that of MR. Findings agree  
294 with the broader binding specificity observed for DC-SIGN (recently reassessed in (30)). We  
295 hypothesise that MR binds a subset of the DC-SIGN binding sites as suggested by the  
296 clustering of the binding sites for both lectins. The confocal study also supports the  
297 heterogeneity of mannose-rich structures within *P. aeruginosa* biofilms as both MR and DC-  
298 SIGN binding patterns differ from that of the HHA lectin, normally used for the detection of  
299 mannose-rich biofilm-associated carbohydrates (21) (Compare Figure 2 and Figure S2). HHA  
300 preferentially binds bacterial aggregates, which indicates preferential binding to mannose  
301 structures associated to bacterial cells. It is possible that MR and/or DC-SIGN binding sites in  
302 cell-associated carbohydrates are blocked through binding to the mannose-specific *P.*  
303 *aeruginosa* lectin LecB that directly interacts with Psl (31). Our results agree with the existence  
304 of distinct Psl epitopes (class I, II, and III) which can be targeted with different monoclonal  
305 antibodies (mAbs) (32) and are differentially distributed within mature PAO1 biofilms (33).

306 The predicted carbohydrate structure for the HMW preparations used in this work do not  
307 conform to that described for Psl, the mannose-rich neutral polysaccharide produced by PAO1  
308 via the *psl* operon products. Byrd et al. described Psl as repeating pentameric units of D-  
309 mannose, L-rhamnose and D-glucose (9). In contrast, our preparation contains a small  
310 proportion of galactose and, unlike the structure proposed for Psl, lacks mannose  $\beta$  anomers.  
311 There is a high proportion of 1-6-linked- $\alpha$ -mannose with some 1-2 linkages, characteristics of  
312 mannans. In *C. albicans* the structure of mannan varies depending on the culture conditions  
313 (34) and it is highly feasible that differences in growth conditions, purification procedures,  
314 including selection of HMW forms, and bacteria strain (WT vs  $\Delta wspF \Delta pel$ ) could account for  
315 these observations. In agreement with our findings Bates et al using the same purification  
316 procedure as ours (19) identified galactose alongside mannose, glucose and rhamnose in  
317 carbohydrates generated from two *P. aeruginosa* isolates (700829 and 700888) and there was  
318 abundance of 2-6 linked (32-28%), 2-linked (20-19 %), 3-linked (16%) and terminal (23-27 %)  
319 mannose. Hence, this work opens the exciting possibility of mannose-rich carbohydrates in *P.*  
320 *aeruginosa* not conforming to a unique structure but displaying adaptability to environmental  
321 changes and/or bacterial genetic makeup further broadening the range of biofilm  
322 arrangements and associated immune responses. The strain  $\Delta wspF \Delta pel$  used to generate  
323 the carbohydrates in this study produces high cyclic-di-GMP levels that could impact on the  
324 regulation of carbohydrate structures. For instance, McCarthy et al demonstrated regulation  
325 of LPS modifications by cyclic-di-GMP in *P. aeruginosa* through binding to WarA, a

326 methyltransferase that regulates O-antigen modal distribution and interacts with components  
327 of the LPS synthesis pathway (35).

328 Release of mannose-rich, well-defined HMW polymeric entities by biofilms (our HMW  
329 preparations derive from cell-free supernatants) raises the possibility of biofilm-associated  
330 carbohydrates acting as immunomodulators on their own. Assays to date using moDCs were  
331 restricted to early responses and failed to detect major changes in cytokine responses to LPS  
332 or Psl-deficient biofilms in the presence of LPS-free HMW-2. Future work will focus on  
333 functional studies such as ability of moDCs to activate T cells in the presence of HMW. Indeed,  
334 the phenotypical changes observed in moDCs with only 10 µg/ml of HMW (cell rounding and  
335 reduced Lewis<sup>x</sup> binding) indicates that HMW could interfere with DC-T cell interactions or DC  
336 migration by interfering with ICAM-3 or ICAM-2 adhesion through DC-SIGN (36, 37).

337 Assays in which moDC were incubated with biofilms with different carbohydrate compositions  
338 (PAO-1,  $\Delta wspF$ ,  $\Delta wspF \Delta pel$  and  $\Delta wspF \Delta psl$ ), Figure S14), failed to show selective  
339 production of cytokines in response to particular biofilm types. These results indicate that  
340 under these experimental conditions the presence and absence of Psl or Pel do not have a  
341 major impact on early cytokine production by moDCs. In addition, preliminary results did not  
342 to show clear trends when moDC- $\Delta wspF$  biofilm co-cultures were performed in the presence  
343 and absence of blocking antibodies against MR and DC-SIGN. Differences in biofilm formation  
344 among assays together with donor variability likely contribute to these findings. While our  
345 moDCs consistently expressed MR and DC-SIGN, levels of surface MR in particular, were  
346 highly variable among donors (Figure S6). In addition, it is possible that during the fixation  
347 process, although bacteria remained damaged and non-culturable for a least 4 h, total  
348 bacterial cell death was not achieved, which could promote inflammatory activation. Current  
349 work in the laboratory focuses on further optimisation and validation of biofilm-moDC co-  
350 cultures and potential stratification of donors based on moDCs receptor expression.

351 The dominance of DC-SIGN binding to *P. aeruginosa* biofilms and planktonic cells highlights  
352 the importance of using infection models where DC-SIGN is present. Early observations linked  
353 DC-SIGN expression in DCs, with biofilm positivity in chronic rhinosinusitis with nasal  
354 polyposis (38), and suggest unique immune responses in the presence of biofilms that  
355 correlate with DC-SIGN expression. In human skin, dermal macrophages express MR and  
356 DC-SIGN (39) and both receptors could contribute to immune responses to *P. aeruginosa*  
357 wound infections. Similarly alveolar macrophages from people with cystic fibrosis have  
358 increased levels of MR (40) and DC-SIGN expression in these cells has also been described  
359 in tuberculosis patients (41). Suitable models to establish contribution of DC-SIGN during *P.*

360 *aeruginosa* infection need to consider lack of DC-SIGN orthologs in mice (12), hence DC-  
361 SIGN transgenic mice offer a suitable alternative (42, 43).

362 In summary, this work demonstrates direct interaction between biofilm-associated  
363 carbohydrates and immune C-type lectins and opens the possibility for these receptors to  
364 contribute to the establishment of chronic infections.

## 365 **Materials and Methods**

### 366 **Biofilm quantification assay**

367 All strains (Table 1), unless otherwise stated, were grown on Lysogenic Broth (LB) agar plates  
368 from glycerol stocks stored at -80°C and incubated overnight at 37°C. Overnight cultures in X-  
369 vivo-15 media (Lonza) (5ml, 37°C, 200/220 rpm) diluted to OD<sub>600nm</sub> 0.01 were cultured for 3 h  
370 at 37°C, 200/220 rpm. The OD<sub>600nm</sub> of mid log phase cultures in X-vivo-15 was adjusted to  
371 0.04 OD<sub>600nm</sub> and 100 µl of cultures were added into each well of a UV-sterilised 96-well plate  
372 [Costar (9017, Corning) or Maxisorp (439454, Nunc immune-plate)]. Cultures incubated for 24  
373 h at 37°C, 5%CO<sub>2</sub> were washed three times with 200 µl of HPLC water and stained with 125  
374 µl of 1% (w/v) crystal violet (1 h, room temperature (RT)). After washing three times in water,  
375 the stain was solubilised by adding 200 µl of 70% ethanol for 15 min; 125 µl was transferred  
376 into a clean 96 well Costar plate to measure the absorbance at 595 nm using a Multiskan FC  
377 (Thermo Scientific).

### 378 **Analysis of the adhesion of planktonic *P. aeruginosa* to plastic**

379 Overnight *P. aeruginosa* cultures were centrifuged at 16,000 × g for 5 min at 4°C, washed  
380 twice with PBS, and re-suspended in 4% (v/v) paraformaldehyde (15710-S, Electronic  
381 Microscopy Sciences, USA) in PBS for 30 min at 4°C. After fixation, cultures were washed  
382 once with PBS, adjusted to 0.5 OD<sub>600nm</sub> in PBS, and pipetted onto Maxisorp plates (50 µl/well).  
383 After washing three times with PBS blocking was carried out by adding 50 µl of 3% (w/v)  
384 bovine serum albumin (BSA) (80400-100, Alpha diagnostics) prepared in PBS. Rabbit anti-  
385 *P. aeruginosa* polyclonal antibody (50 µl/well, ab68538, Abcam) diluted 1:1000 in PBS was  
386 added and incubated for 90 min at RT. After three washes in PBS, the plate was incubated  
387 with 50 µl of goat anti-rabbit IgG conjugated to alkaline phosphatase diluted 1:2000 (A3687,  
388 Sigma) in PBS for 1 h at RT. After three washes with AP buffer (100 mM Tris-HCl, 100 mM  
389 NaCl, 1 mM MgCl<sub>2</sub>, pH 9.5), 50 µl of p-nitrophenyl phosphate substrate solution (Sigma) were  
390 added to each well and incubated for 30-40 min at room temperature in the dark. Absorbance  
391 was measured at 405 nm using a Multiskan FC (Thermo Scientific).

### 392 **Lectin binding assays**

393 Assays for the binding of chimeric proteins to fixed *P. aeruginosa* biofilms, fixed planktonic *P.*  
394 *aeruginosa* cells and purified carbohydrate were performed as follows. Biofilms were grown  
395 on a Costar (9017, Corning) or Maxisorp (439454, Nunc immune-plate) plate over 24 h and  
396 fixed with 50 µl of 2% paraformaldehyde in PBS for 10 min at 4°C. For fixed *P. aeruginosa*  
397 cells, wells of Maxisorp plates were coated with fixed bacteria (100 µl/per well) and incubated  
398 at 4°C overnight. Purified biofilm carbohydrate was added to Maxisorp plates overnight (50

399  $\mu$ l/well in 154 mM NaCl, 37°C). In all instances, plates were washed three times with TBS (10  
400 mM Tris-HCl, pH 7.5, 10 mM CaCl<sub>2</sub>, 154 mM NaCl and 0.05% (v/v) Tween 20). Chimeric  
401 proteins MR-CTLD4-7 (CTLD-4-7-Fc, prepared in house, (14)) and DC-SIGN (Fc-DC-SIGN-  
402 Fc, R&D) (50  $\mu$ l/well in TBS) were added and incubated for 2 h at RT. After three washes with  
403 TBS, anti-human Fc-conjugated to alkaline phosphatase (A9544, Sigma) was added (50  
404  $\mu$ l/well) and incubated for 1 h, RT (1:1000 dilution). After washing three times with TBS,  
405 alkaline phosphatase activity was measured as above. Inhibition assays were carried out as  
406 above but using TSB buffer containing 1M NaCl (TSB-high salt). MR-CTLD4-7 and DC-SIGN  
407 were pre-incubated with different concentrations of the monosaccharides mannose (63579,  
408 Fluka), fucose (47870, Fluka), or galactose (4829, Fluka) in TSB-high salt for 30 min at RT.  
409 After pre-incubation, proteins were added to appropriate wells containing biofilms. Polymers  
410 containing D-mannose, L-fucose, Lewis<sup>x</sup> or D-galactose (2-5  $\mu$ g/ml, 50  $\mu$ l per well, Lectinity)  
411 were used as controls. Binding of HHA to purified carbohydrates was tested in a similar way  
412 using alkaline phosphatase-conjugated HHA (20  $\mu$ g/ml, LA-8008-1 EY laboratories).

#### 413 **Study of DC-SIGN and MR-CTLD4-7 binding to *P. aeruginosa* biofilms by confocal** 414 **microscopy.**

415 Biofilms generated under flow on  $\mu$ -Slide VI 0.4 (Ibidi) as described in Figure S2, were fixed  
416 with 4% (v/v) paraformaldehyde in PBS (100  $\mu$ l per channel, 10 min, 4°C), and washed three  
417 times with TSB buffer. In some instances, wells were stained with FM 1-43 FX membrane dye  
418 (100  $\mu$ l per channel, 2-10  $\mu$ g/ml, F35355, Thermofisher) in PBS for 30 min on ice. Following  
419 three washes with TSB buffer MR-CR-FNII-CTLD1-3 (15), MR-CTLD4-7 or DC-SIGN (30  $\mu$ l  
420 per channel, 10  $\mu$ g/ml in TSB buffer) were added and incubated for 2 h at RT. After washing  
421 three times with TSB buffer, 100  $\mu$ l of TSB containing 10  $\mu$ g/ml goat anti-Human IgG  
422 conjugated to Alexa fluor 647 (A21445, Invitrogen) and 3%(v/v) Donkey serum (D9663,  
423 Sigma) in TBS were added and incubated for 1 h at RT. Following three washes with TSB,  
424 DNA was labelled with DAPI (100  $\mu$ l per channel, 2  $\mu$ g/ml D9542, Sigma-Aldrich) in PBS for  
425 15 min, RT. The plates were washed with TSB and mounted in Ibidi mounting media (50001,  
426 Ibidi, 50001) before storing at 4°C in the dark. Confocal images were acquired using Zeiss  
427 LSM 880 using a 40x /1.20 water objective, the collection was not done with filters.  
428 Fluorescence emission was collected between 434 and 515 nm (DAPI), 469-538 nm (FM 1-  
429 43FX), 641-688 nm (AF 647). Stack size (49.43  $\mu$ m, y: 49.43  $\mu$ m, z: 7.5-12.9  $\mu$ m). Presented  
430 single slice size (49.43  $\mu$ m, y: 49.43  $\mu$ m, z: 0.288-0.293  $\mu$ m). Images were processed using  
431 Fiji (44).

#### 432 **Carbohydrate purification**

433 Carbohydrate was extracted from  $\Delta wspF \Delta pel$  (7) cultures as described previously (19).  
434 Overnight cultures in 20 ml, TSB medium, (22092, Sigma) were added to TSB medium in a  
435 1.5 L flask (400 ml per flask) and incubated statically at 37°C for five days. Cultures were  
436 treated with formaldehyde (final concentration 0.02% (v/v) from 36.5% solution-33220, Sigma-  
437 Aldrich) 1 h, RT, 100 rpm followed by NaOH (a final concentration of 275 mM, S318-1, Fisher  
438 Scientific) 3h, RT, 100 rpm. Cultures were centrifuged (16,000 x g ,1 h, 4°C) and supernatant  
439 was collected, filtered and dialysed/concentrated against HPLC water using VIVAFLOW 200,  
440 MWCO 10 kDa (Sartorius Stedim Biotech) to a maximum final volume of 50 ml. Proteins and  
441 nucleic acids were precipitated using tri-chloro-acetic acid (TCA, 20% (w/v), 3000-50, Fisher  
442 scientific) at 4°C for 30 min. The solution was centrifuged (16,000 x g, 1 h at 4 °C) and the  
443 supernatant was collected into a fresh clean glass bottle and EPS was precipitated away from  
444 lipids by incubation with 1.5 volumes of cold 95% (v/v) ethanol -20 °C, 24 h. This step was  
445 done twice to improve purity. The solution was centrifuged at 16,000 x g for 1 h at 4°C and the  
446 pellet was re-suspended in HPLC water, dialysed against HPLC water using a 12–14 kDa  
447 MWCO membrane (68100, Snakeskin), and lyophilized. The lyophilized powder was re-  
448 suspended in PBS (pH 7.4) and fractionated on a HiPrep 26/60, Sephacryl S-200 HR gel  
449 filtration column (GE Healthcare) calibrated with protein standards (1511901, Bio-rad) to  
450 generate a standard curve showing the retention time of molecular weight standard. For the  
451 gel filtration, the equivalent of 2.4 or 3.6 litres of culture were pooled for each column run. High  
452 molecular weight (>45 kDa) and low molecular weight preparations (<45 kDa) were pooled,  
453 dialysed against HPLC water. Endotoxin was eliminated by repeated passages (x10) through  
454 an endotoxin removal column (Thermofisher UK) following the manufacturer's  
455 recommendations.

## 456 **Carbohydrate analysis**

457 **Molecular weight analysis.** Molecular weight, polydispersity and polymer distribution values  
458 were derived from gel permeation chromatography (GPC) with a Viscotek/Malvern GPC  
459 system consisting of a GPCMax autoinjector fitted to a TDA 305 detector (Viscotek/Malvern,  
460 Houston, TX). The TDA contains a refractive index detector, a low angle laser light scattering  
461 detector, a right angle laser light scattering detector, an intrinsic viscosity detector and a UV  
462 detector ( $\lambda = 254$  nm). Three Waters Ultrahydrogel columns, i.e. 1200, 500 and 120, were  
463 fitted in series (Waters Corp. Milford, MA). The columns and detectors were maintained at  
464 40°C within the TDA 305. The system was calibrated using Malvern pullulan and dextran  
465 standards. The mobile phase was 50mM sodium nitrite. The mobile phase was filter sterilized  
466 (0.45  $\mu$ m) into a 5 L mobile phase reservoir. Psl samples were dissolved (6 mg/ml) in mobile  
467 phase (50 mM sodium nitrite, pH 7.3). The samples were incubated for ~60 min at 60°C,  
468 followed by sterile filtration (0.45  $\mu$ m) and injected into the GPC (50 - 200  $\mu$ L). Sample

469 recovery was routinely >90%. Dn/dc for each sample was calculated using the OmniSec  
470 software (v. 4.6.1.354). The data were analysed using a single peak assignment in order to  
471 obtain an average molecular weight for the entire polymer distribution. Each sample was  
472 analyzed in duplicate or triplicate. Replicate analysis of calibration standards indicated  
473 reproducibility of + 3%, which is well within the limits of the technique.

474 **Proton nuclear magnetic resonance.** Carbohydrate preparations were structurally  
475 characterised by solution-state 1D <sup>1</sup>H NMR spectroscopy and 2D COSY and HSQC NMR  
476 spectroscopy. 1D NMR data acquisition and analysis was based on methods from Lowman  
477 et al. (20, 34). Briefly, NMR spectra were collected on a Bruker Avance III 400 NMR  
478 spectrometer operating at 331°K (58°C) in 5mm NMR tubes. Each carbohydrate (about 5 mg)  
479 was dissolved in about 550 µl DH<sub>2</sub>O (Cambridge Isotope Laboratories, 99.8+% deuterated).  
480 Chemical shift referencing was accomplished relative to TMS<sup>+</sup> at 0.0 ppm. The proton 1D  
481 NMR spectra were collected with 36 scans, 65,536 data points, 20 ppm sweep width centered  
482 at 6.2 ppm, and 1 s pulse delay and processed using exponential apodization with 0.3 Hz line  
483 broadening. COSY spectra were collected using 2048 by 128 data points, 16 dummy scans,  
484 64 scans, and 9.0 ppm sweep width centered at 4.5 ppm and processed with sine apodization  
485 in both dimensions and zero-filled to 1024 data points in f1. HSQC spectra were collected  
486 using 1024 by 256 data points, 4 dummy scans, 128 scans, and 6.0 ppm sweep width in f2  
487 and 185 ppm sweep width in f1 and processed with qsine apodization in both dimensions and  
488 zero-filled to 1024 data points in both dimensions. Polymer hydrolysis was accomplished by  
489 heating the isolate in 33% TFA-d in D<sub>2</sub>O at 80 °C overnight. Processing was accomplished  
490 with Bruker TopSpin (version 4.0.6) on the MacBook Pro.

#### 491 **Measurement of HMW-2 binding to recombinant human MR and biotinylated DC-SIGN** 492 **by bilayer interferometry**

493 Binding experiments were performed on an Octet K2 bilayer interferometry system (ForteBio,  
494 San Jose, CA) in 10X Kinetics Buffer at 30°C and 1000 RPM. Black bottomed 96-well plates  
495 were from Grenier Bio-One and the optical biosensor probes from ForteBio. Recombinant  
496 human MR (CD206) with a poly- His-tag was purchased from R and D Systems (Minneapolis,  
497 MN). Biotinylated DC-SIGN was generated as described (22). Ni-NTA or SA biosensor was  
498 placed in the instrument, and after an equilibration period of 3 min the biosensor was exposed  
499 to either the poly-His-tagged MR or the biotinylated DC-SIGN at a concentration of 0.1 mg/mL  
500 for 5 min, and then transferred to 10 X Kinetics Buffer for 10 min to establish the BLI signal  
501 from the immobilized receptor. Following this, a series of eight similar 5 min exposures to 2-  
502 fold increasing concentrations (3.125-400 mg/mL) of carbohydrate each followed by 10 min  
503 dissociation in 10X Kinetics Buffer were performed. For each exposure, the equilibrium BLI



504 signal was measured 20 s after the switch to Kinetics Buffer and used in the analysis of  
505 binding. A parallel biosensor with immobilized receptor, but not carbohydrate, was placed in  
506 10X Kinetics Buffer and used to control for receptor dissociation during the experiment. Data  
507 analysis was performed on GraphPad Prism 7.0 software. The series of BLI signals for each  
508 concentration was fit to models of nonspecific linear binding, saturable specific binding, and  
509 specific binding plus nonspecific binding with either local variable or shared global values for  
510 each parameter. The sequential F-statistic with a  $p < 0.05$  was used to select the most  
511 appropriate model for each carbohydrate – receptor interaction. Results are reported as mean  
512 values with 95% confidence intervals for apparent equilibrium dissociation constant ( $K_D$ ),  
513 maximum BLI signal ( $B_{MAX}$ ), and nonspecific binding ( $K_{NS}$ ).

#### 514 **Generation of human monocyte-derived dendritic cells**

515 Human monocyte-derived dendritic cells (moDCs) were prepared from buffy coats (Blood  
516 Transfusion Service, Sheffield, UK). Use of buffy coats was approved by the Faculty of  
517 Medicine and Health Sciences Research Ethics Committee. PBMCs were isolated using  
518 Histopaque-1077 (H8889, Sigma) and monocytes were isolated using human CD14  
519 MicroBeads (130-050-201, Miltenyi Biotec) following the manufacturer's protocol. Purified  
520 monocytes were cultured in RPMI complete medium [RPMI-1640 (R0883, Sigma), 15% (v/v)  
521 human AB serum (PAA Laboratories, UK), 2 mM L-glutamine (G7513, Sigma), 10 mM HEPES  
522 (15630056, Gibco), 50 ng/ml recombinant human granulocyte macrophage colony-stimulating  
523 factor (rhGM-CSF) (130-093-865, Miltenyi Biotec), and 50 ng/ml rh interleukin (IL)-4 (130-093-  
524 921, Miltenyi Biotec)] and cultured at 37°C, 5%CO<sub>2</sub> for 6-7 days. On Day 3, fresh RPMI  
525 complete media containing growth factors was added to each well.

#### 526 **Analysis of changes in moDC morphology after incubation with HMW**

527 For the analysis of morphological changes in moDCs in the presence of Psl,  $\mu$ -Slide VI 0.4  
528 tissue culture treated channels (80606, Ibidi) were coated with HMW (10  $\mu$ g/ml, in X-vivo-15)  
529 overnight at 4°C. After washing, and addition of moDCs (5 x 10<sup>4</sup> cells per channel in X-vivo 15  
530 containing GM-CSF and IL-4) cultures were incubated for 24 h at 37°C, 5% CO<sub>2</sub>. Samples  
531 were fixed in 4% (v/v) Paraformaldehyde Aqueous Solution (15710-s, EM Grade) in PEM  
532 (Cytoskeleton-preserving buffer PIPES-EGTA-Magnesium, 80 mM PIPES pH 6.8, 5 mM  
533 EGTA, 2 mM MgCl<sub>2</sub>) for 15 min, RT. Slides were washed in PEM and blocked with 5% donkey  
534 serum in PEM in the presence or absence of 0.25% Triton X-100. After 3 washes in PEM,  
535 cells were labelled with DAPI (1.5  $\mu$ g/ml in PBS, D9542, Sigma-Aldrich), washed in PBS and  
536 mounted in Ibidi mounting media (50001, Ibidi). Confocal images were acquired using Zeiss  
537 LSM 710 under 40x /1.3 oil objective, without filters. Fluorescence emission was collected  
538 between 410 and 585 nm (DAPI) and 638-755 nm (AF 647). Image size (212.55  $\mu$ m, y: 212.55

539  $\mu\text{m}$ , z: 0.406  $\mu\text{m}$ ). Images were analysed using Fiji. Raw Integrated density and cell perimeter  
540 were measured by manually following the contour of the cell using the segmented line tool  
541 (width=12 nm). Circularity (the ratio between longer and shortest axes for each cell) was  
542 determined by manually following the contour of the cell using the free hand line tool. The  
543 selected areas were then saved in the ROI manager for analysis. Single per unit area was  
544 calculated by (Raw Integrated density / area selected using the segmented line tool (width=12  
545 nm) = single per unit area).

#### 546 **Cell association assay of fluorescent monosaccharide polymers**

547 U937 cells transfected with human DC-SIGN (U937-DC-SIGN) and controls U937 cells were  
548 obtained from the American Type Culture Collection (ATCC) and grown in suspension in  
549 RPMI-1640 medium (R0883, Sigma) containing 10% (v/v) foetal bovine serum (FBS, F9665,  
550 Sigma), 2 mM L-glutamine (35050-038, Gibco), 10 mM HEPES buffer (15630-056Gibco), 1  
551 mM sodium pyruvate (11360-039, Gibco), 4.5 g/L D-glucose (A24940-01, Gibco) and 0.15 %  
552 (v/v) sodium bicarbonate (S8761, Sigma). U937 cells and moDCs were harvested by  
553 centrifugation at 250 x g for 5 min, washed in opti-MEM serum-free media (Gibco), re-  
554 suspended in opti-MEM, adjusted to  $1.25 \times 10^6$  cells/ml and plated in 24 well tissue culture  
555 plates (250,000 cells/well, Costar) and incubated for 30 min at 37°C. Fluorescent  
556 monosaccharide polymers: Lewis<sup>x</sup>-PAA-FITC, fucose-PAA-FITC or galactose-PAA-FITC  
557 (Lectinity) were added to each well (5  $\mu\text{g}/\text{ml}$  final) and opti-MEM to controls. Cultures were  
558 incubated for 1 h at 37°C and then transferred to fluorescein-activated cell sorting (FACS)  
559 tubes and 1 ml of FACS Buffer (0.5% (v/v) FBS, 15 mM  $\text{NaN}_3$  in PBS with  $\text{Ca}^{2+}$  and  $\text{Mg}^{2+}$   
560 (D8537, Sigma)) was added to each tube. Cells were washed twice in FACS buffer by  
561 centrifugation at 300 x g for 5 min and re-suspended in 200 $\mu\text{l}$  of FACS buffer and fixed with  
562 2% (v/v) Paraformaldehyde in PBS. Cells were analysed using Beckman Coulter FC500 flow  
563 cytometer. Data was analysed using Kaluza analysis software 1.5a. For cell association  
564 inhibition assays cells were pre-incubated with HMW, or opti-MEM for 1 h at 37°C before  
565 addition of fluorescent monosaccharide polymers. A similar procedure was used for CHO and  
566 CHO-MR cells but, being adherent cells, all washes were done in the wells and cells were  
567 harvested using trypsin-EDTA for analysis as described (45).

#### 568 **Statistical analysis**

569 Statistical analysis was performed in GraphPad Prism.

570

571 **Acknowledgements**

572 This project was funded by The Medical Research Council project MR/P001033/1 to LMP, MC  
573 and PW. MA was funded by King Khalid University, Saudi Arabia. YA is funded by Shaqra  
574 University, Saudi Arabia, KL is funded by MRC-IMPACT PhD studentship. YI was funded by  
575 FP7 Marie Curie Fellowship grant PIIF-GA-2012-329832 and is receiving funding from the  
576 University of Tartu Institute of Technology. MC, LMP and PW are also funded by the National  
577 Biofilms Innovation Centre (NBIC) which is an Innovation and Knowledge Centre funded by  
578 the Biotechnology and Biological Sciences Research Council, Innovate UK and Hartree  
579 Centre [Award Number BB/R012415/1]. The funders had no role in study design, data  
580 collection and analysis, decision to publish, or preparation of the manuscript.

581

582

## 583 References

- 584 1. Mulcahy LR, Isabella VM, Lewis K. *Pseudomonas aeruginosa* biofilms in disease.  
585 *Microb Ecol.* 2014;68(1):1-12.
- 586 2. Davies JC, Bilton D. Bugs, biofilms, and resistance in cystic fibrosis. *Respiratory care.*  
587 2009;54(5):628-40.
- 588 3. O'Sullivan BP, Freedman SD. Cystic fibrosis. *Lancet.* 2009;373(9678):1891-904.
- 589 4. Breidenstein EB, de la Fuente-Nunez C, Hancock RE. *Pseudomonas aeruginosa*: all  
590 roads lead to resistance. *Trends Microbiol.* 2011;19(8):419-26.
- 591 5. Jensen PO, Givskov M, Bjarnsholt T, Moser C. The immune system vs. *Pseudomonas*  
592 *aeruginosa* biofilms. *FEMS Immunol Med Microbiol.* 2010;59(3):292-305.
- 593 6. Colvin KM, Irie Y, Tart CS, Urbano R, Whitney JC, Ryder C, et al. The Pel and Psl  
594 polysaccharides provide *Pseudomonas aeruginosa* structural redundancy within the biofilm  
595 matrix. *Environmental microbiology.* 2012;14(8):1913-28.
- 596 7. Irie Y, Borlee BR, O'Connor JR, Hill PJ, Harwood CS, Wozniak DJ, et al. Self-produced  
597 exopolysaccharide is a signal that stimulates biofilm formation in *Pseudomonas aeruginosa*.  
598 *Proceedings of the National Academy of Sciences of the United States of America.*  
599 2012;109(50):20632-6.
- 600 8. Franklin MJ, Nivens DE, Weadge JT, Howell PL. Biosynthesis of the *Pseudomonas*  
601 *aeruginosa* Extracellular Polysaccharides, Alginate, Pel, and Psl. *Frontiers in microbiology.*  
602 2011;2:167.
- 603 9. Byrd MS, Sadovskaya I, Vinogradov E, Lu H, Sprinkle AB, Richardson SH, et al.  
604 Genetic and biochemical analyses of the *Pseudomonas aeruginosa* Psl exopolysaccharide  
605 reveal overlapping roles for polysaccharide synthesis enzymes in Psl and LPS production. *Mol*  
606 *Microbiol.* 2009;73(4):622-38.
- 607 10. Jennings LK, Storek KM, Ledvina HE, Coulon C, Marmont LS, Sadovskaya I, et al. Pel  
608 is a cationic exopolysaccharide that cross-links extracellular DNA in the *Pseudomonas*  
609 *aeruginosa* biofilm matrix. *Proceedings of the National Academy of Sciences of the United*  
610 *States of America.* 2015;112(36):11353-8.
- 611 11. Martinez-Pomares L. The mannose receptor. *Journal of leukocyte biology.*  
612 2012;92(6):1177-86.
- 613 12. Garcia-Vallejo JJ, van Kooyk Y. The physiological role of DC-SIGN: a tale of mice and  
614 men. *Trends Immunol.* 2013;34(10):482-6.
- 615 13. Lam JS, Taylor VL, Islam ST, Hao Y, Kocincova D. Genetic and Functional Diversity  
616 of *Pseudomonas aeruginosa* Lipopolysaccharide. *Frontiers in microbiology.* 2011;2:118.
- 617 14. Linehan SA, Martinez-Pomares L, da Silva RP, Gordon S. Endogenous ligands of  
618 carbohydrate recognition domains of the mannose receptor in murine macrophages,  
619 endothelial cells and secretory cells; potential relevance to inflammation and immunity. *Eur J*  
620 *Immunol.* 2001;31(6):1857-66.
- 621 15. Martinez-Pomares L, Wienke D, Stillion R, McKenzie EJ, Arnold JN, Harris J, et al.  
622 Carbohydrate-independent recognition of collagens by the macrophage mannose receptor.  
623 *Eur J Immunol.* 2006;36(5):1074-82.
- 624 16. Irie Y, Starkey M, Edwards AN, Wozniak DJ, Romeo T, Parsek MR. *Pseudomonas*  
625 *aeruginosa* biofilm matrix polysaccharide Psl is regulated transcriptionally by RpoS and post-  
626 transcriptionally by RsmA. *Mol Microbiol.* 2010;78(1):158-72.
- 627 17. Pestrak MJ, Chaney SB, Eggleston HC, Dellos-Nolan S, Dixit S, Mathew-Steiner SS,  
628 et al. *Pseudomonas aeruginosa* rugose small-colony variants evade host clearance, are  
629 hyper-inflammatory, and persist in multiple host environments. *PLoS Pathog.*  
630 2018;14(2):e1006842.
- 631 18. Murphy K, Park AJ, Hao Y, Brewer D, Lam JS, Khursigara CM. Influence of O  
632 polysaccharides on biofilm development and outer membrane vesicle biogenesis in  
633 *Pseudomonas aeruginosa* PAO1. *J Bacteriol.* 2014;196(7):1306-17.
- 634 19. Bales PM, Renke EM, May SL, Shen Y, Nelson DC. Purification and Characterization  
635 of Biofilm-Associated EPS Exopolysaccharides from ESKAPE Organisms and Other  
636 Pathogens. *PLoS one.* 2013;8(6):e67950.

- 637 20. Lowman DW, West LJ, Bearden DW, Wempe MF, Power TD, Ensley HE, et al. New  
638 insights into the structure of (1 $\rightarrow$ 3,1 $\rightarrow$ 6)-beta-D-glucan side chains in the *Candida glabrata*  
639 cell wall. *PloS one*. 2011;6(11):e27614.
- 640 21. Zhao K, Tseng BS, Beckerman B, Jin F, Gibiansky ML, Harrison JJ, et al. Psl trails  
641 guide exploration and microcolony formation in *Pseudomonas aeruginosa* biofilms. *Nature*.  
642 2013;497(7449):388-91.
- 643 22. Feinberg H, Guo Y, Mitchell DA, Drickamer K, Weis WI. Extended neck regions  
644 stabilize tetramers of the receptors DC-SIGN and DC-SIGNR. *The Journal of biological*  
645 *chemistry*. 2005;280(2):1327-35.
- 646 23. Relloso M, Puig-Kroger A, Pello OM, Rodriguez-Fernandez JL, de la Rosa G, Longo  
647 N, et al. DC-SIGN (CD209) expression is IL-4 dependent and is negatively regulated by IFN,  
648 TGF-beta, and anti-inflammatory agents. *Journal of immunology*. 2002;168(6):2634-43.
- 649 24. Liu Y, Chirino AJ, Misulovin Z, Leteux C, Feizi T, Nussenzweig MC, et al. Crystal  
650 structure of the cysteine-rich domain of mannose receptor complexed with a sulfated  
651 carbohydrate ligand. *J Exp Med*. 2000;191(7):1105-16.
- 652 25. Yamada KJ, Kielian T. Biofilm-Leukocyte Cross-Talk: Impact on Immune Polarization  
653 and Immunometabolism. *J Innate Immun*. 2019;11(3):280-8.
- 654 26. Geijtenbeek TB, van Kooyk Y. Pathogens target DC-SIGN to influence their fate DC-  
655 SIGN functions as a pathogen receptor with broad specificity. *APMIS*. 2003;111(7-8):698-714.
- 656 27. Nigou J, Zelle-Rieser C, Gilleron M, Thurnher M, Puzo G. Mannosylated  
657 lipoarabinomannans inhibit IL-12 production by human dendritic cells: evidence for a negative  
658 signal delivered through the mannose receptor. *Journal of immunology*. 2001;166(12):7477-  
659 85.
- 660 28. Borlee BR, Goldman AD, Murakami K, Samudrala R, Wozniak DJ, Parsek MR.  
661 *Pseudomonas aeruginosa* uses a cyclic-di-GMP-regulated adhesin to reinforce the biofilm  
662 extracellular matrix. *Mol Microbiol*. 2010;75(4):827-42.
- 663 29. Xaplanteri P, Lagoumintzis G, Dimitracopoulos G, Paliogianni F. Synergistic regulation  
664 of *Pseudomonas aeruginosa*-induced cytokine production in human monocytes by mannose  
665 receptor and TLR2. *Eur J Immunol*. 2009;39(3):730-40.
- 666 30. Vendele I, Willment JA, Silva LM, Palma AS, Chai W, Liu Y, et al. Mannan detecting  
667 C-type lectin receptor probes recognise immune epitopes with diverse chemical, spatial and  
668 phylogenetic heterogeneity in fungal cell walls. *PLoS Pathog*. 2020;16(1):e1007927.
- 669 31. Passos da Silva D, Matwichuk ML, Townsend DO, Reichhardt C, Lamba D, Wozniak  
670 DJ, et al. The *Pseudomonas aeruginosa* lectin LecB binds to the exopolysaccharide Psl and  
671 stabilizes the biofilm matrix. *Nat Commun*. 2019;10(1):2183.
- 672 32. Li H, Mo K-F, Wang Q, Stover CK, DiGiandomenico A, Boons G-J. Epitope Mapping  
673 of Monoclonal Antibodies using Synthetic Oligosaccharides Uncovers Novel Aspects of  
674 Immune Recognition of the Psl Exopolysaccharide of *Pseudomonas aeruginosa*. *Chemistry –*  
675 *A European Journal*. 2013;19(51):17425-31.
- 676 33. Ray VA, Hill PJ, Stover CK, Roy S, Sen CK, Yu L, et al. Anti-Psl Targeting of  
677 *Pseudomonas aeruginosa* Biofilms for Neutrophil-Mediated Disruption. *Scientific Reports*.  
678 2017;7(1):16065.
- 679 34. Lowman DW, Ensley HE, Greene RR, Knagge KJ, Williams DL, Kruppa MD. Mannan  
680 structural complexity is decreased when *Candida albicans* is cultivated in blood or serum at  
681 physiological temperature. *Carbohydr Res*. 2011;346(17):2752-9.
- 682 35. McCarthy RR, Mazon-Moya MJ, Moscoso JA, Hao Y, Lam JS, Bordi C, et al. Cyclic-  
683 di-GMP regulates lipopolysaccharide modification and contributes to *Pseudomonas*  
684 *aeruginosa* immune evasion. *Nat Microbiol*. 2017;2:17027.
- 685 36. Geijtenbeek TB, Torensma R, van Vliet SJ, van Duijnhoven GC, Adema GJ, van Kooyk  
686 Y, et al. Identification of DC-SIGN, a novel dendritic cell-specific ICAM-3 receptor that supports  
687 primary immune responses. *Cell*. 2000;100(5):575-85.
- 688 37. Geijtenbeek TB, Krooshoop DJ, Bleijs DA, van Vliet SJ, van Duijnhoven GC,  
689 Grabovsky V, et al. DC-SIGN-ICAM-2 interaction mediates dendritic cell trafficking. *Nat*  
690 *Immunol*. 2000;1(4):353-7.

- 691 38. Karosi T, Csomor P, Hegyi Z, Sziklai I. The presence of CD209 expressing dendritic  
692 cells correlates with biofilm positivity in chronic rhinosinusitis with nasal polyposis. *Eur Arch*  
693 *Otorhinolaryngol.* 2013;270(9):2455-63.
- 694 39. Ochoa MT, Loncaric A, Krutzik SR, Becker TC, Modlin RL. "Dermal dendritic cells"  
695 comprise two distinct populations: CD1+ dendritic cells and CD209+ macrophages. *The*  
696 *Journal of investigative dermatology.* 2008;128(9):2225-31.
- 697 40. Murphy BS, Bush HM, Sundareshan V, Davis C, Hagadone J, Cory TJ, et al.  
698 Characterization of macrophage activation states in patients with cystic fibrosis. *Journal of*  
699 *cystic fibrosis : official journal of the European Cystic Fibrosis Society.* 2010;9(5):314-22.
- 700 41. Tailleux L, Pham-Thi N, Bergeron-Lafaurie A, Herrmann JL, Charles P, Schwartz O, et  
701 al. DC-SIGN induction in alveolar macrophages defines privileged target host cells for  
702 mycobacteria in patients with tuberculosis. *PLoS Med.* 2005;2(12):e381.
- 703 42. Anthony RM, Kobayashi T, Wermeling F, Ravetch JV. Intravenous gammaglobulin  
704 suppresses inflammation through a novel T(H)2 pathway. *Nature.* 2011;475(7354):110-3.
- 705 43. Schaefer M, Reiling N, Fessler C, Stephani J, Taniuchi I, Hatam F, et al. Decreased  
706 pathology and prolonged survival of human DC-SIGN transgenic mice during mycobacterial  
707 infection. *Journal of immunology.* 2008;180(10):6836-45.
- 708 44. Schindelin J, Arganda-Carreras I, Frise E, Kaynig V, Longair M, Pietzsch T, et al. Fiji:  
709 an open-source platform for biological-image analysis. *Nat Methods.* 2012;9(7):676-82.
- 710 45. Su Y, Bakker T, Harris J, Tsang C, Brown GD, Wormald MR, et al. Glycosylation  
711 influences the lectin activities of the macrophage mannose receptor. *The Journal of biological*  
712 *chemistry.* 2005;280(38):32811-20.
- 713 46. Holloway BW, Krishnapillai V, Morgan AF. Chromosomal Genetics of *Pseudomonas*.  
714 *Microbiol Rev.* 1979;43(1):73-102.
- 715 47. Hickman JW, Tifrea DF, Harwood CS. A chemosensory system that regulates biofilm  
716 formation through modulation of cyclic diguanylate levels. *P Natl Acad Sci USA.*  
717 2005;102(40):14422-7.

718

719

720

721 **Table 1. Strains used in this study**

722

| Strain                            | Features                                                                   | Reference |
|-----------------------------------|----------------------------------------------------------------------------|-----------|
| PAO1                              | WT<br>Physiological levels of c-di GMP<br>Expresses Psl and Pel            | (46)      |
| $\Delta wspF$                     | High cellular levels of c-di GMP<br>Expresses Psl and Pel                  | (47)      |
| $\Delta wspF\Delta pel$           | High cellular levels of c-di GMP<br>Overexpresses Psl<br>Lacks Pel         | (16)      |
| $\Delta wspF\Delta psI$           | High cellular levels of c-di GMP<br>Overexpresses Pel<br>Lacks Psl         |           |
| $\Delta wspF\Delta pel\Delta psI$ | High cellular levels of c-di GMP<br>Lacks Psl and Pel<br>Biofilm deficient | (28)      |
| $\Delta wbpM$                     | CPA <sup>+</sup> /OSA <sup>-</sup>                                         | (18)      |
| $\Delta rmd$                      | CPA <sup>-</sup> /OSA <sup>+</sup>                                         |           |
| $\Delta wbpL$                     | CPA <sup>-</sup> /OSA <sup>-</sup>                                         |           |

723

724

725 **Supporting Information**

726 **Figure S1.** Point mutations identified within the *psl* operon in the *P. aeruginosa* wound isolates  
727 used in this study.

728 **Figure S2.** Generation of PAO1 biofilms under standardized flow conditions

729 **Figure S3.** Characterisation of HMW carbohydrate preparations

730 **Figure S4.** Binding of MR and DC-SIGN to HMW carbohydrate preparations is dose and Ca<sup>2+</sup>  
731 dependent.

732 **Figure S5.** <sup>1</sup>H-NMR analysis of HMW-1 and MHW-2.

733 **Figure S6.** Analysis of DC-SIGN and MR expression by moDCs

734 **Figure S7.** LPS-free HMW-2 does not affect cytokine production by moDCs in response LPS.

735 **Figure S8.** LPS-free HMW-2 does not influence the late response of moDCs to LPS.

736 **Figure S9.** LPS-free HMW-2 does not affect cytokine production by moDCs in response to  
737 Psl-deficient biofilms or planktonic cultures.

738 **Figure S10.** Specific detection of DC-SIGN in human DCs in the presence and absence of  
739 HMW-2.

740 **Figure S11.** Polymyxin B does not affect HMW-1 and HMW-2-mediated inhibition of Lewisx  
741 uptake by moDCs.

742 **Figure S12.** Analysis of human MR binding to Lewis<sup>x</sup>-PAA using surface plasmon resonance.

743 **Figure S13.** LPS removal does not affect the ability of HMW-2 to inhibit ligand internalisation  
744 by DC-SIGN and MR expressing cells.

745 **Figure S14.** Biofilm carbohydrate composition does not influence cytokine production by  
746 moDCs.

747 **Video S1.** Binding of DC-SIGN to PAO1 biofilms

748 **Video S2.** Binding of MR (CTLD4-7) to PAO1 biofilms

749 **Video S3.** Secondary antibody control for DC-SIGN

750 **Video S4.** Secondary antibody control for MR (CTLD4-7)

751 **Video S5.** Binding of MR (CR-FNII-CTLD1-3) to PAO1 biofilms



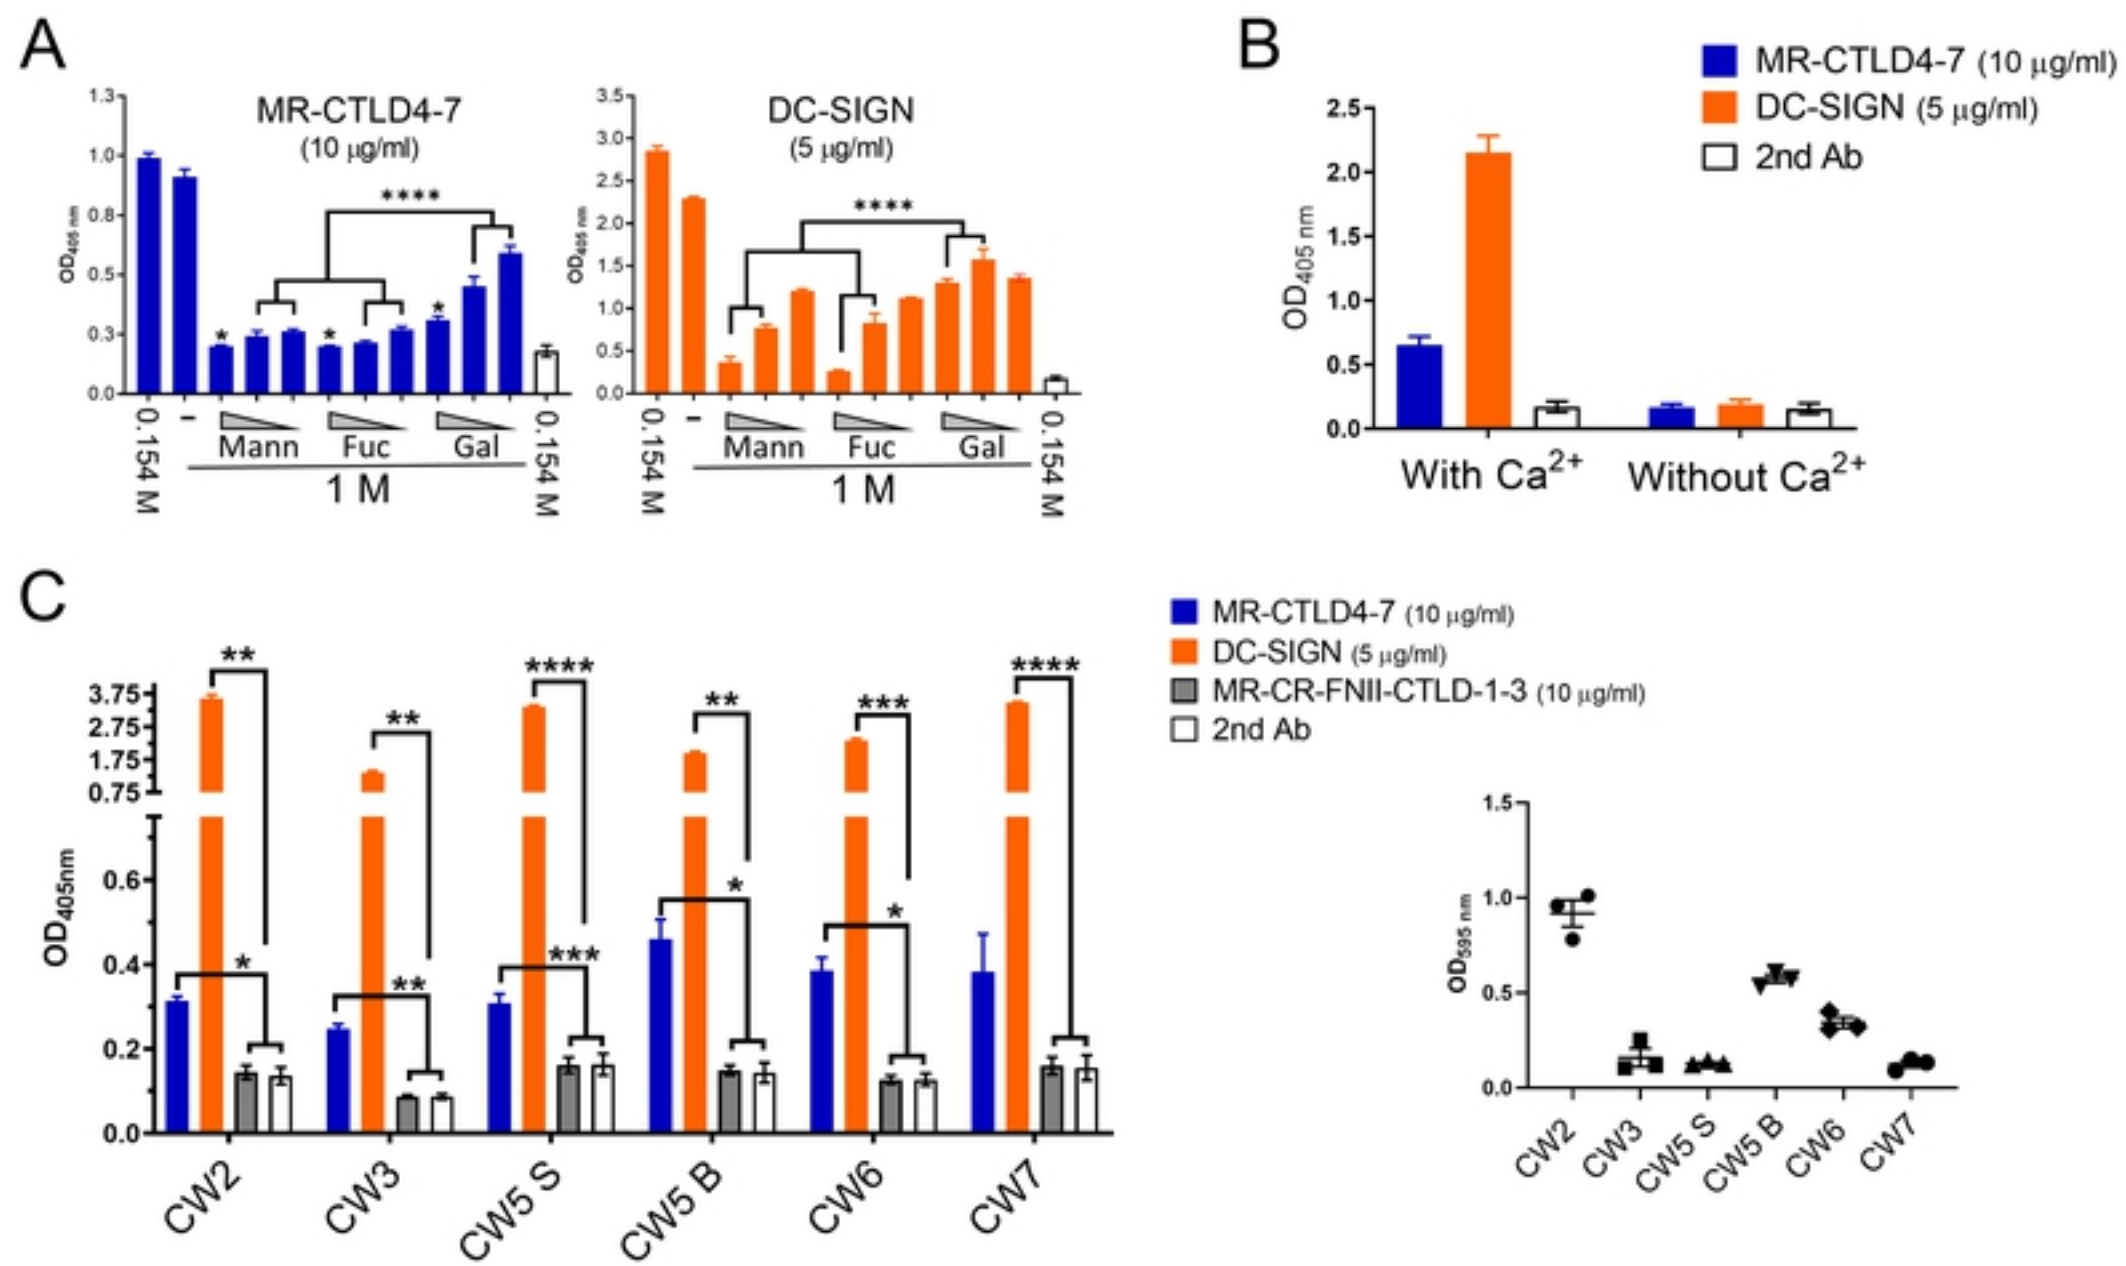

Figure 1

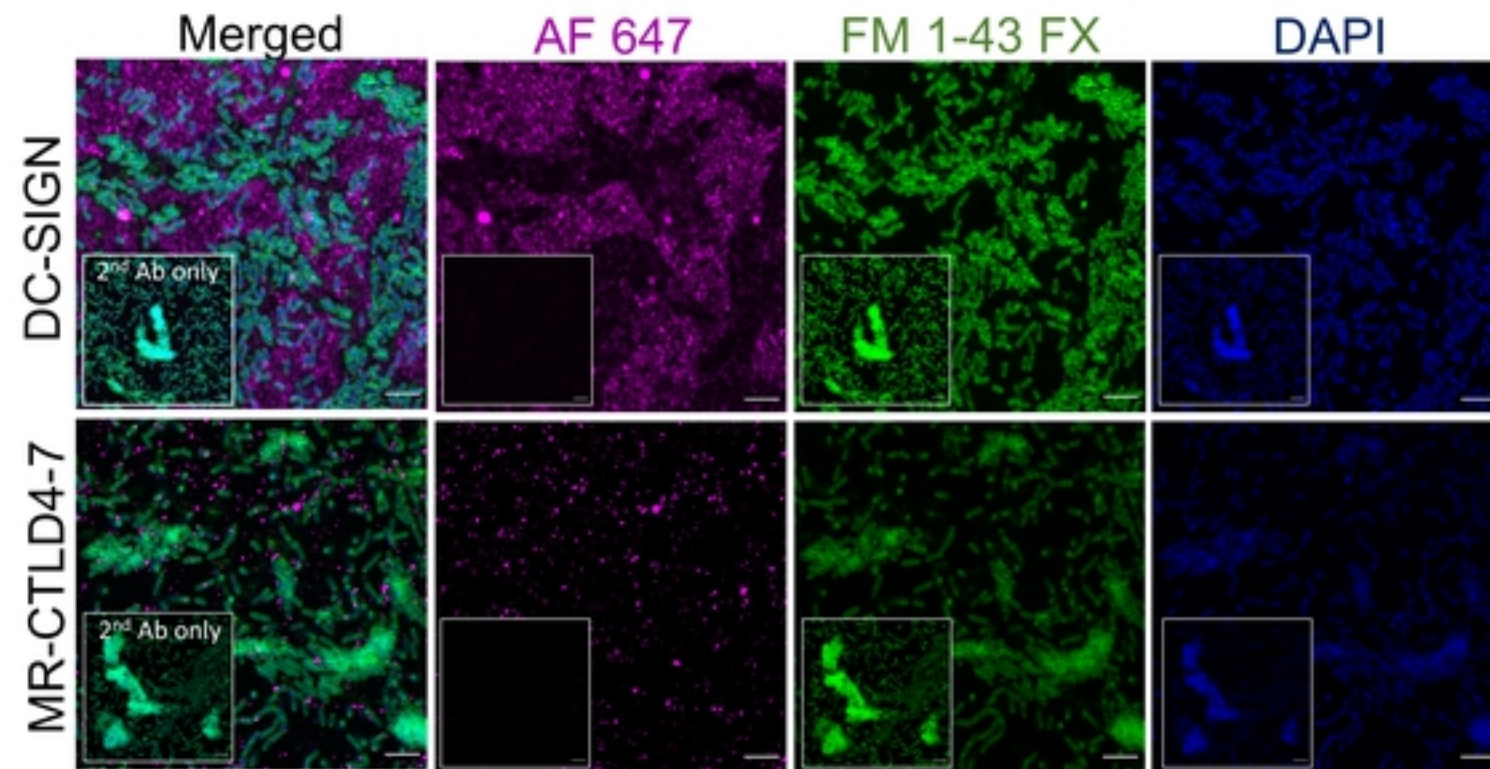

Figure 2

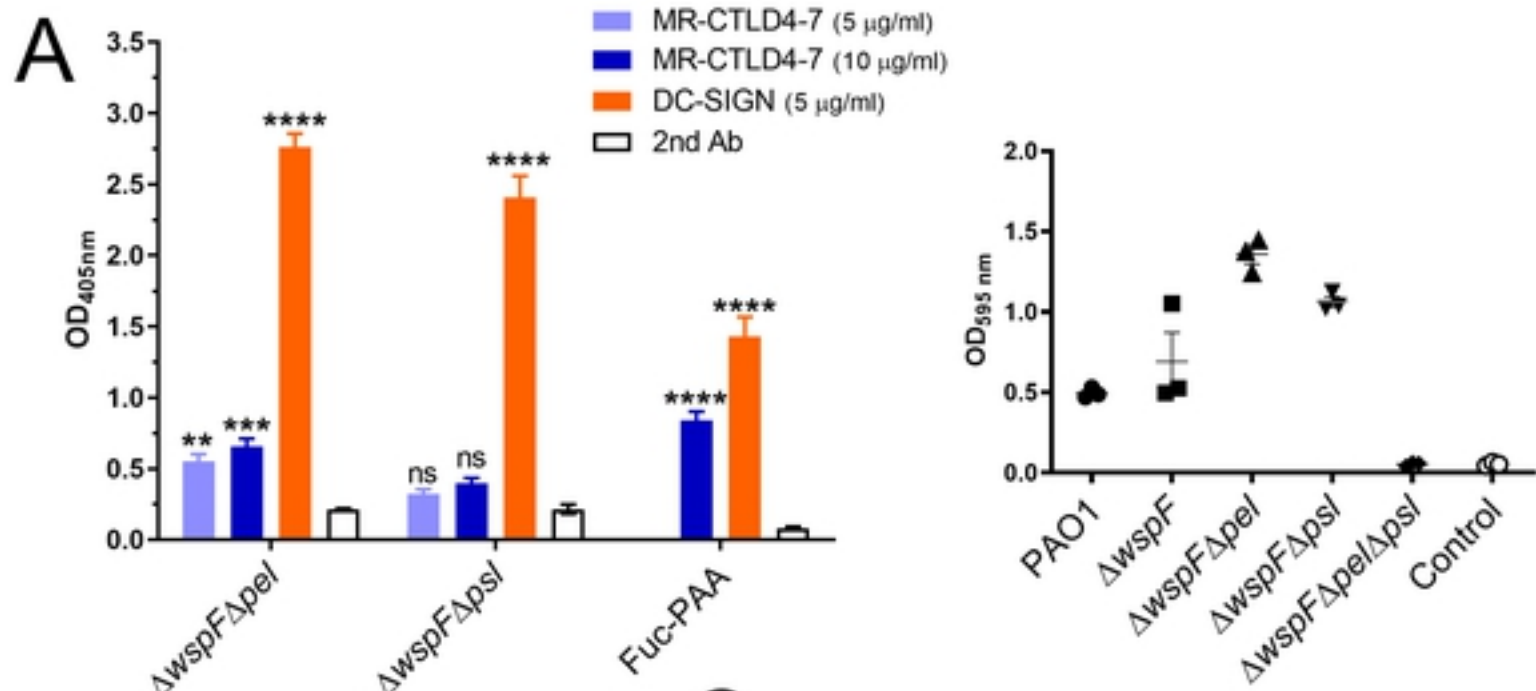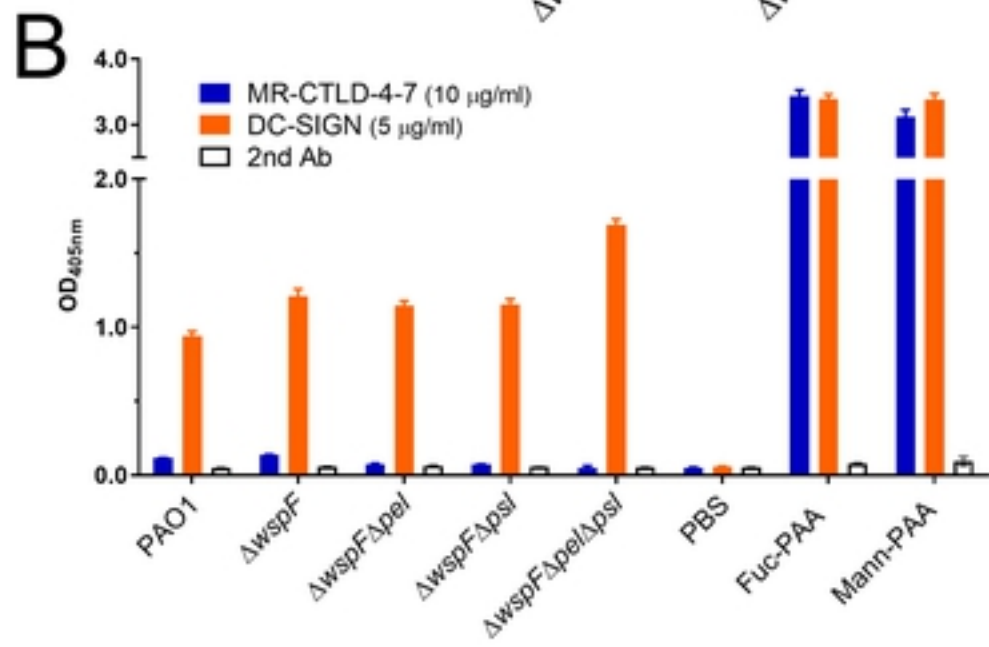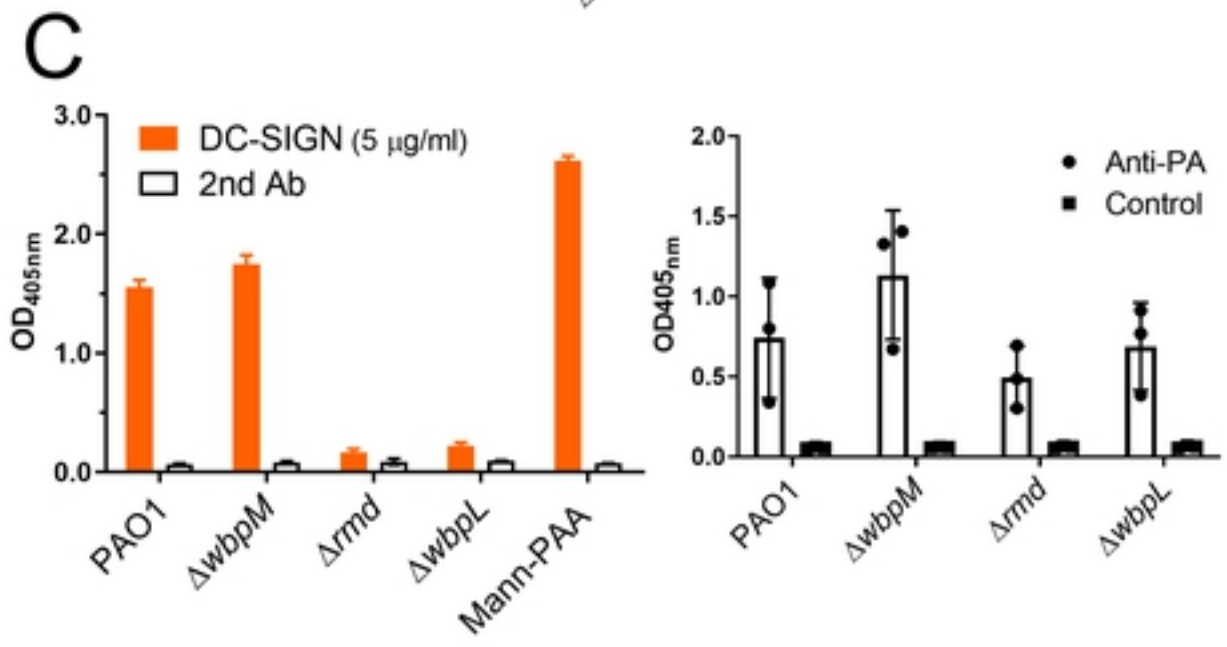

Figure 3

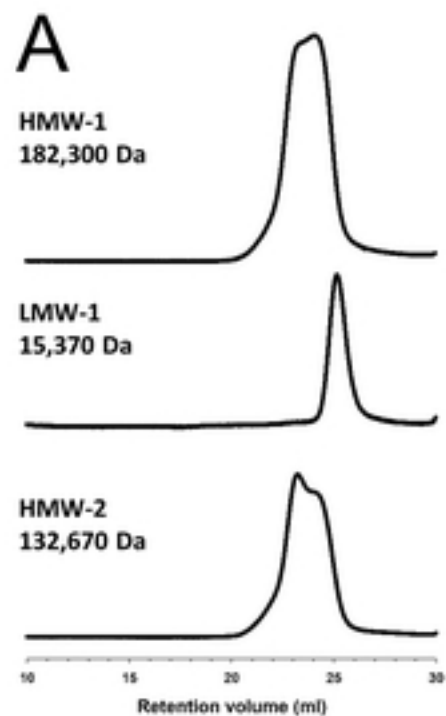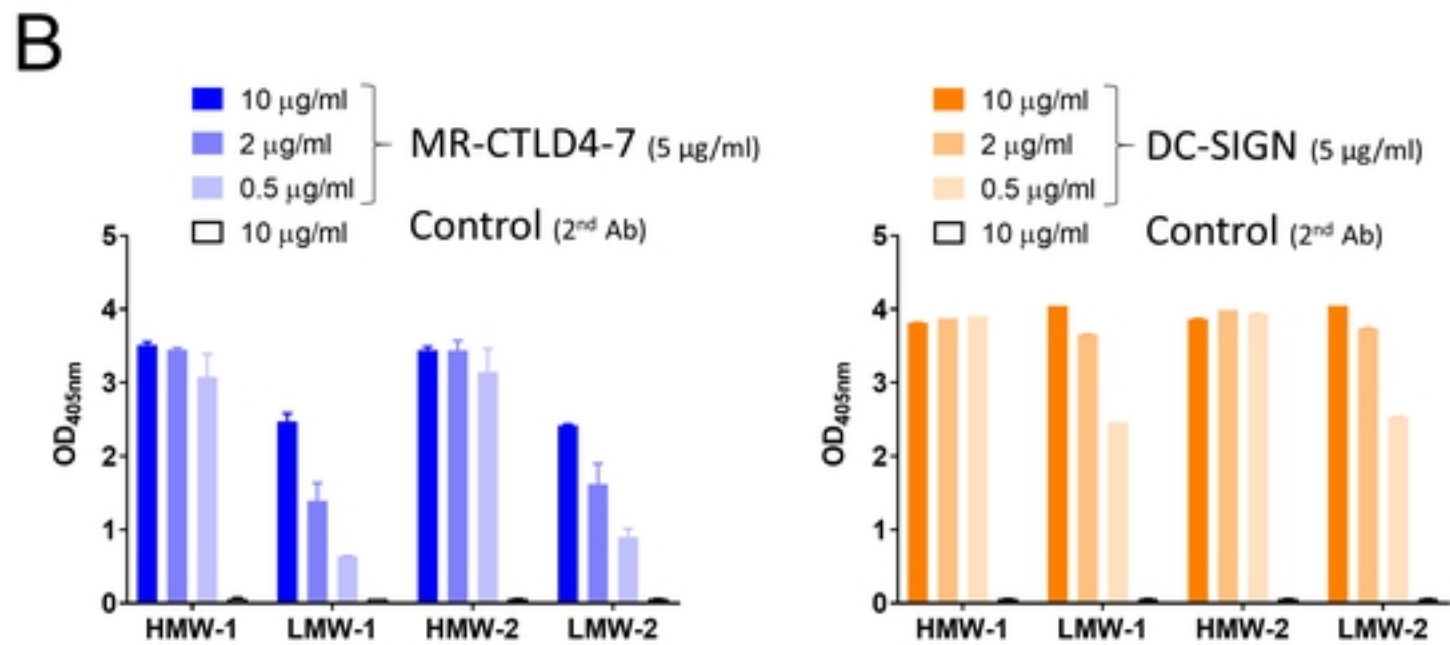

Figure 4

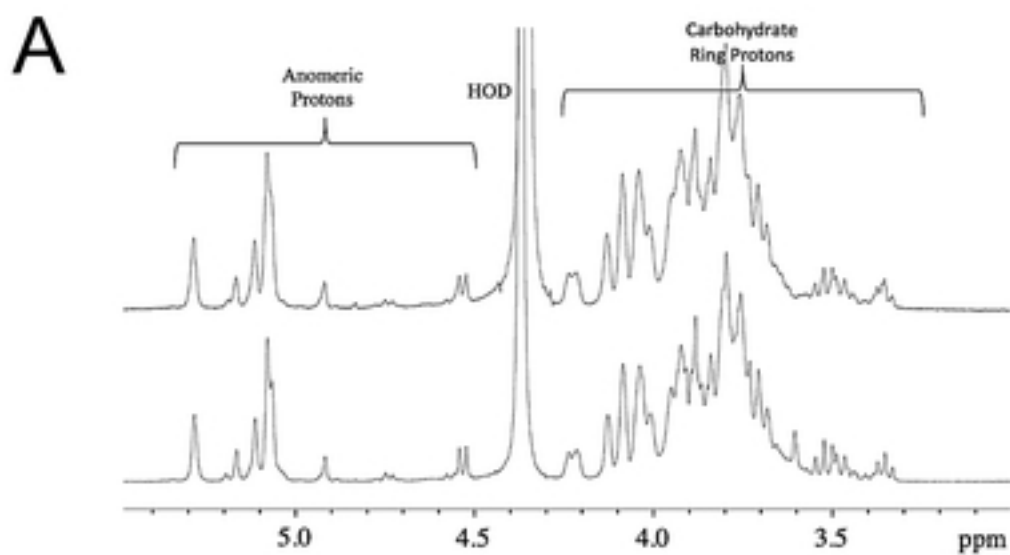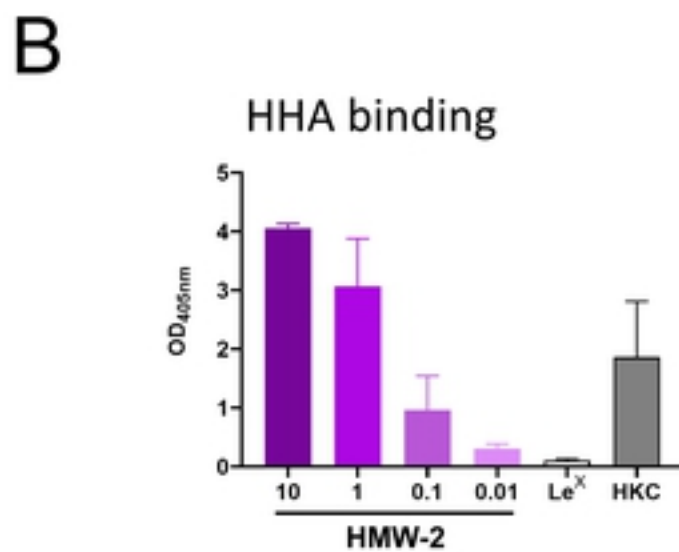

**C**

| Receptor  | $K_D$<br>( $\mu\text{M}$ )    | $B_{\text{MAX}}$<br>(BLI)     | $K_{\text{NON-SPECIFIC}}$<br>(BLI/ $\mu\text{M}$ ) |
|-----------|-------------------------------|-------------------------------|----------------------------------------------------|
| rhMR      | <b>0.114</b><br>(0.088-0.147) | <b>0.517</b><br>(0.271-0.764) | 0.009623<br>(-0.00087-<br>0.020116)                |
| rhDC-SIGN | <b>0.103</b><br>(0.062-0.143) | <b>0.100</b><br>(0.052-0.148) | 0.0007828<br>(0.005647-<br>0.01001)                |

Figure 5

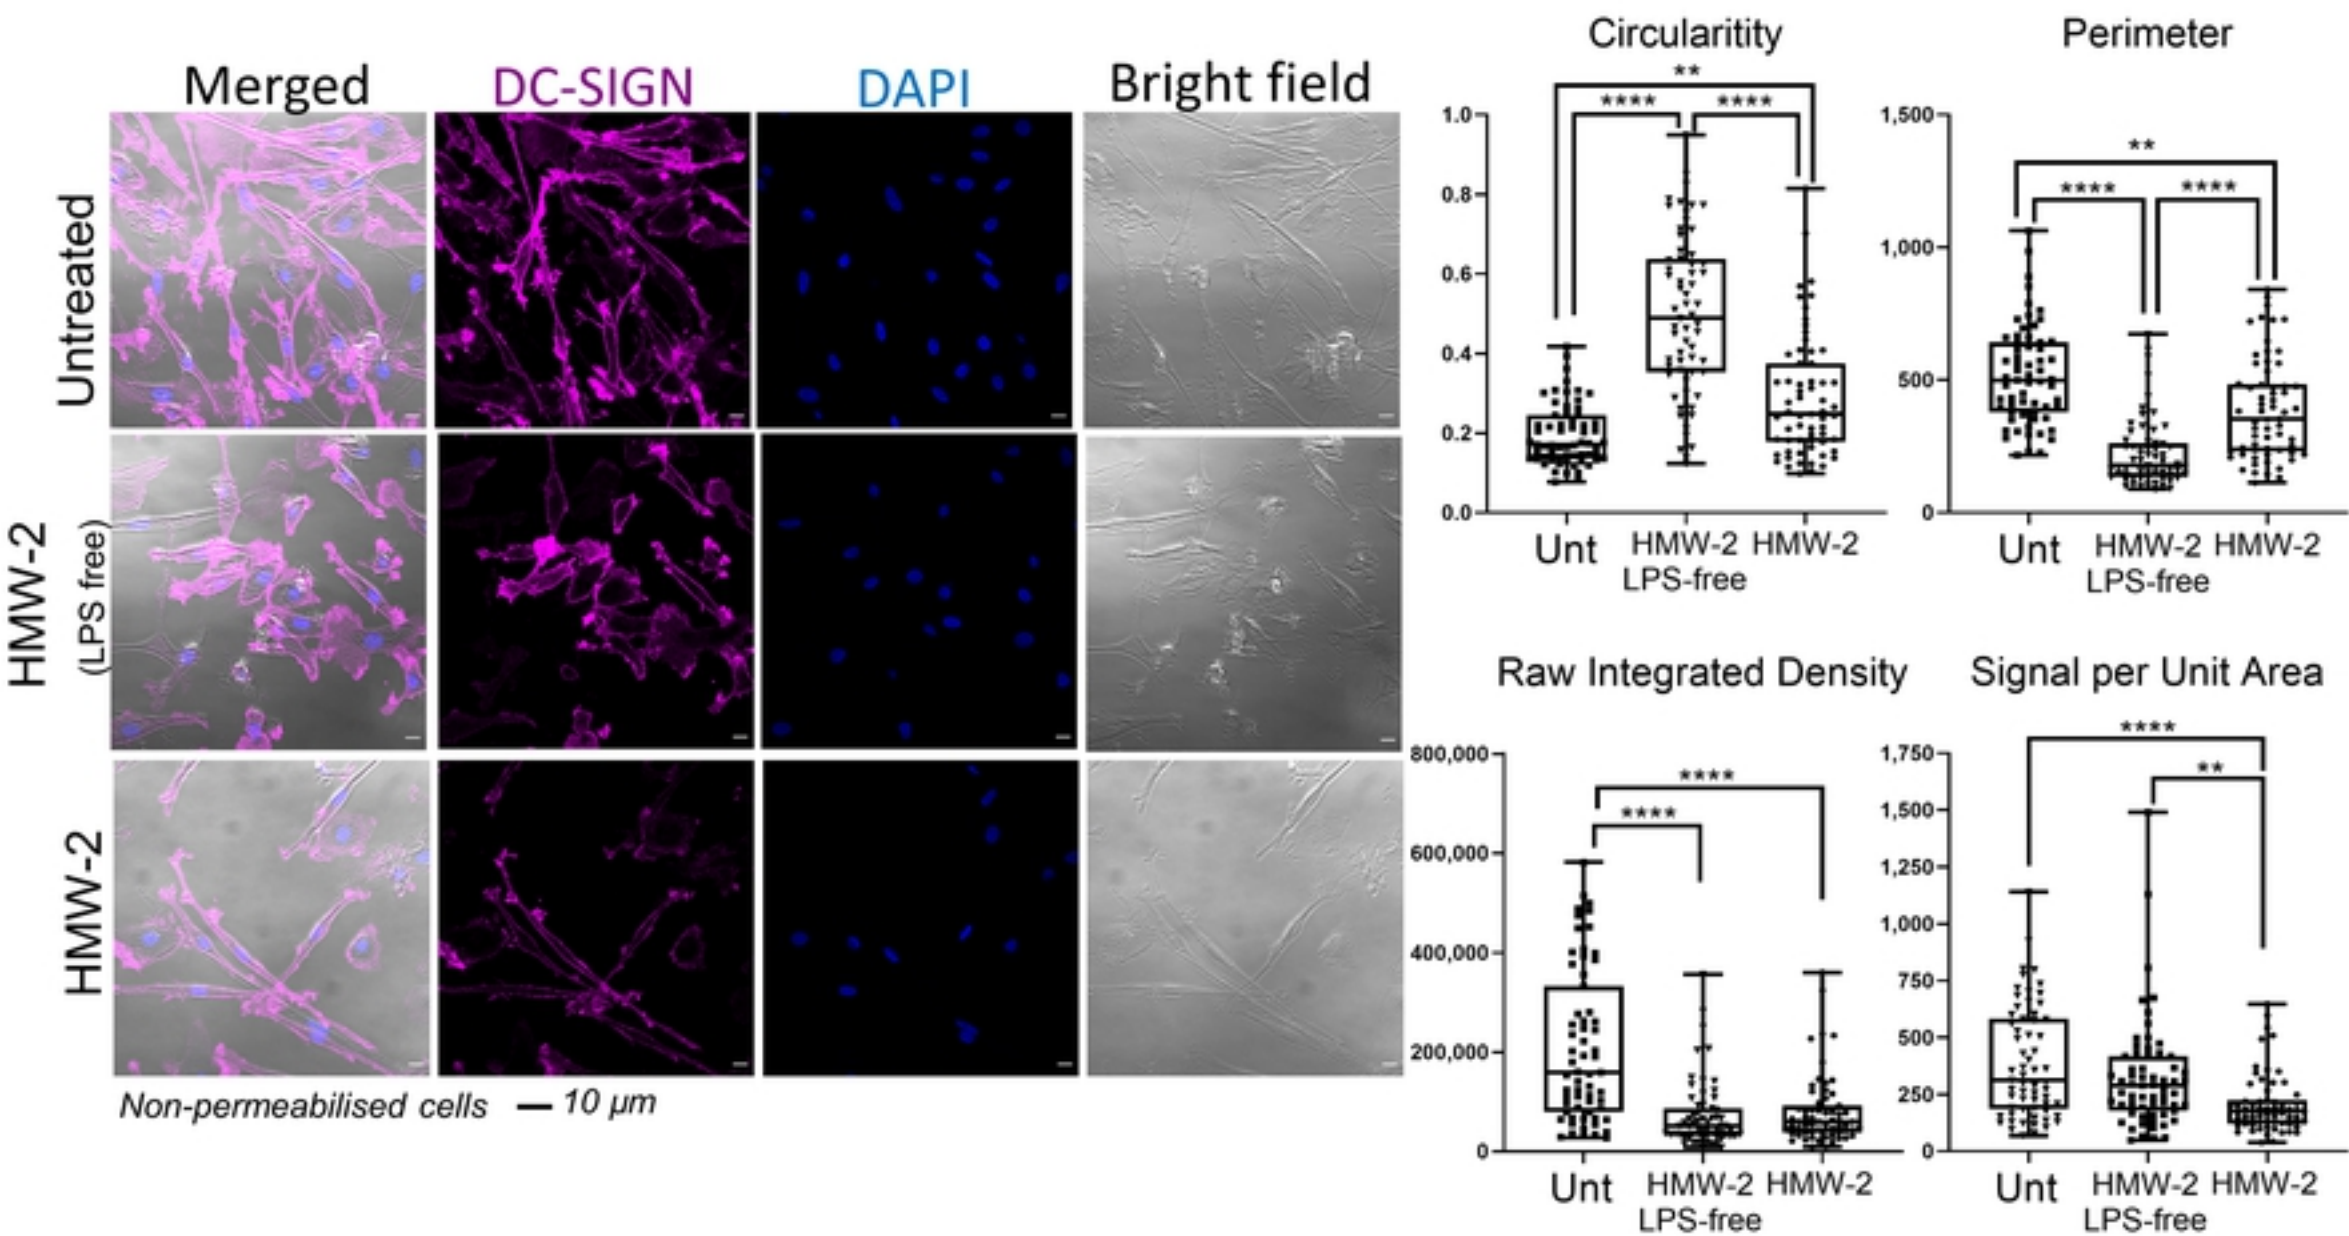

Figure 6

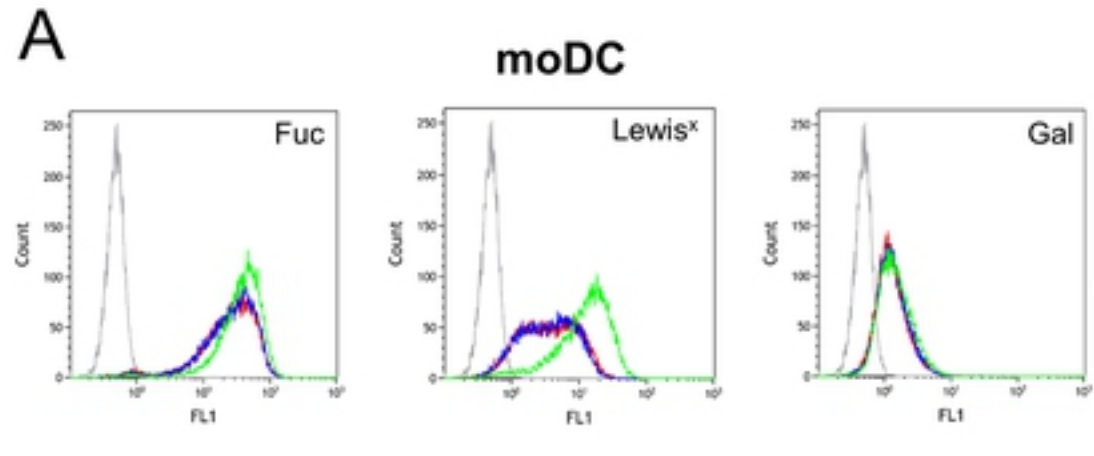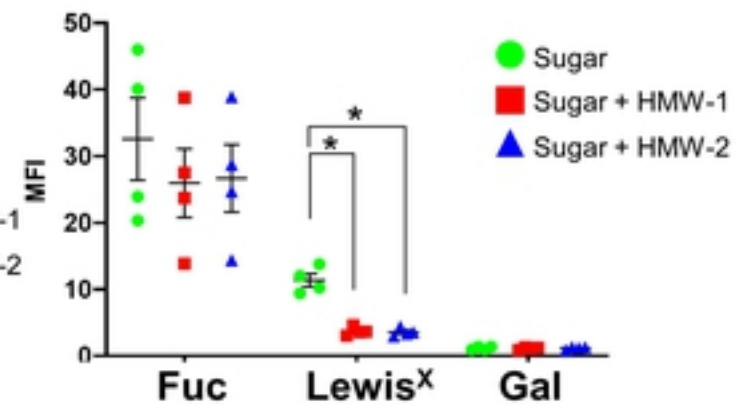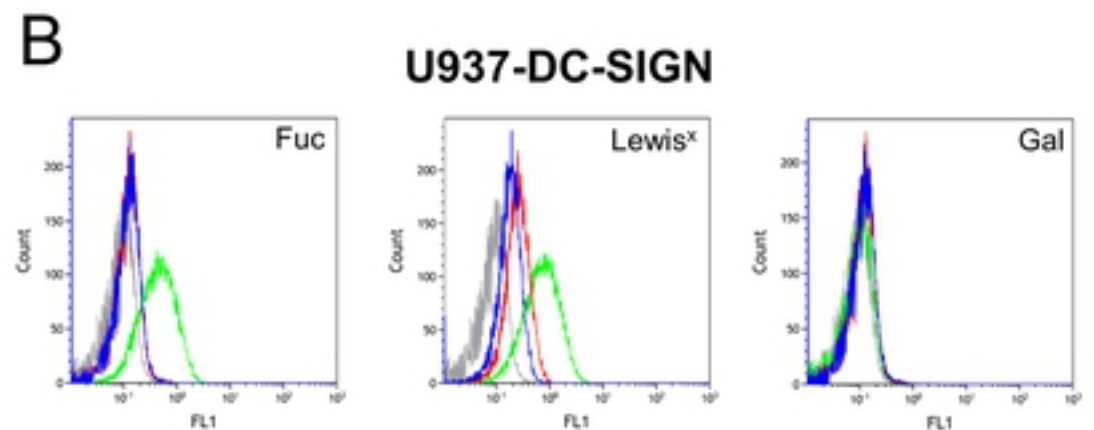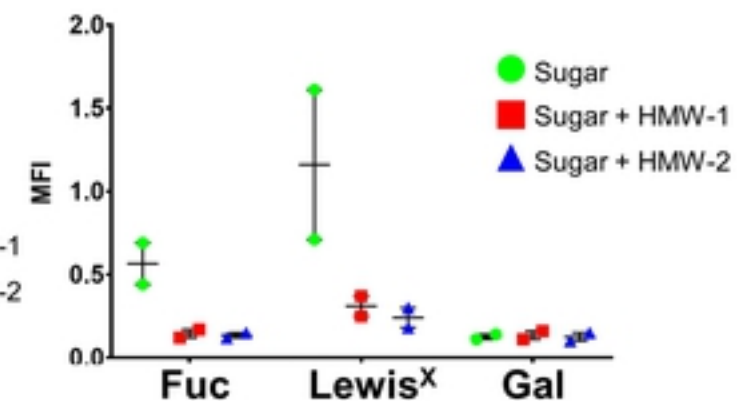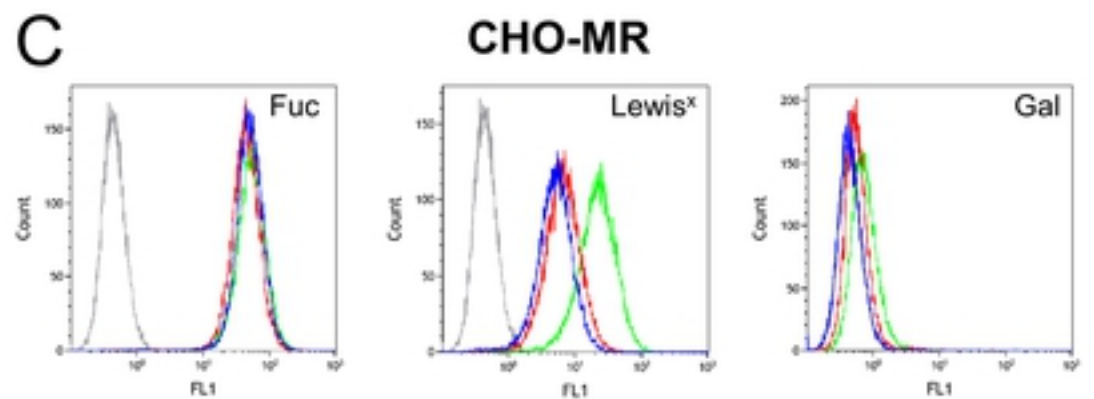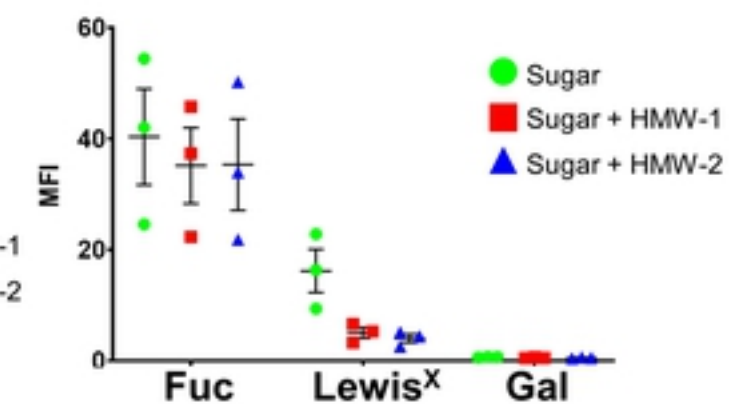

Figure 7

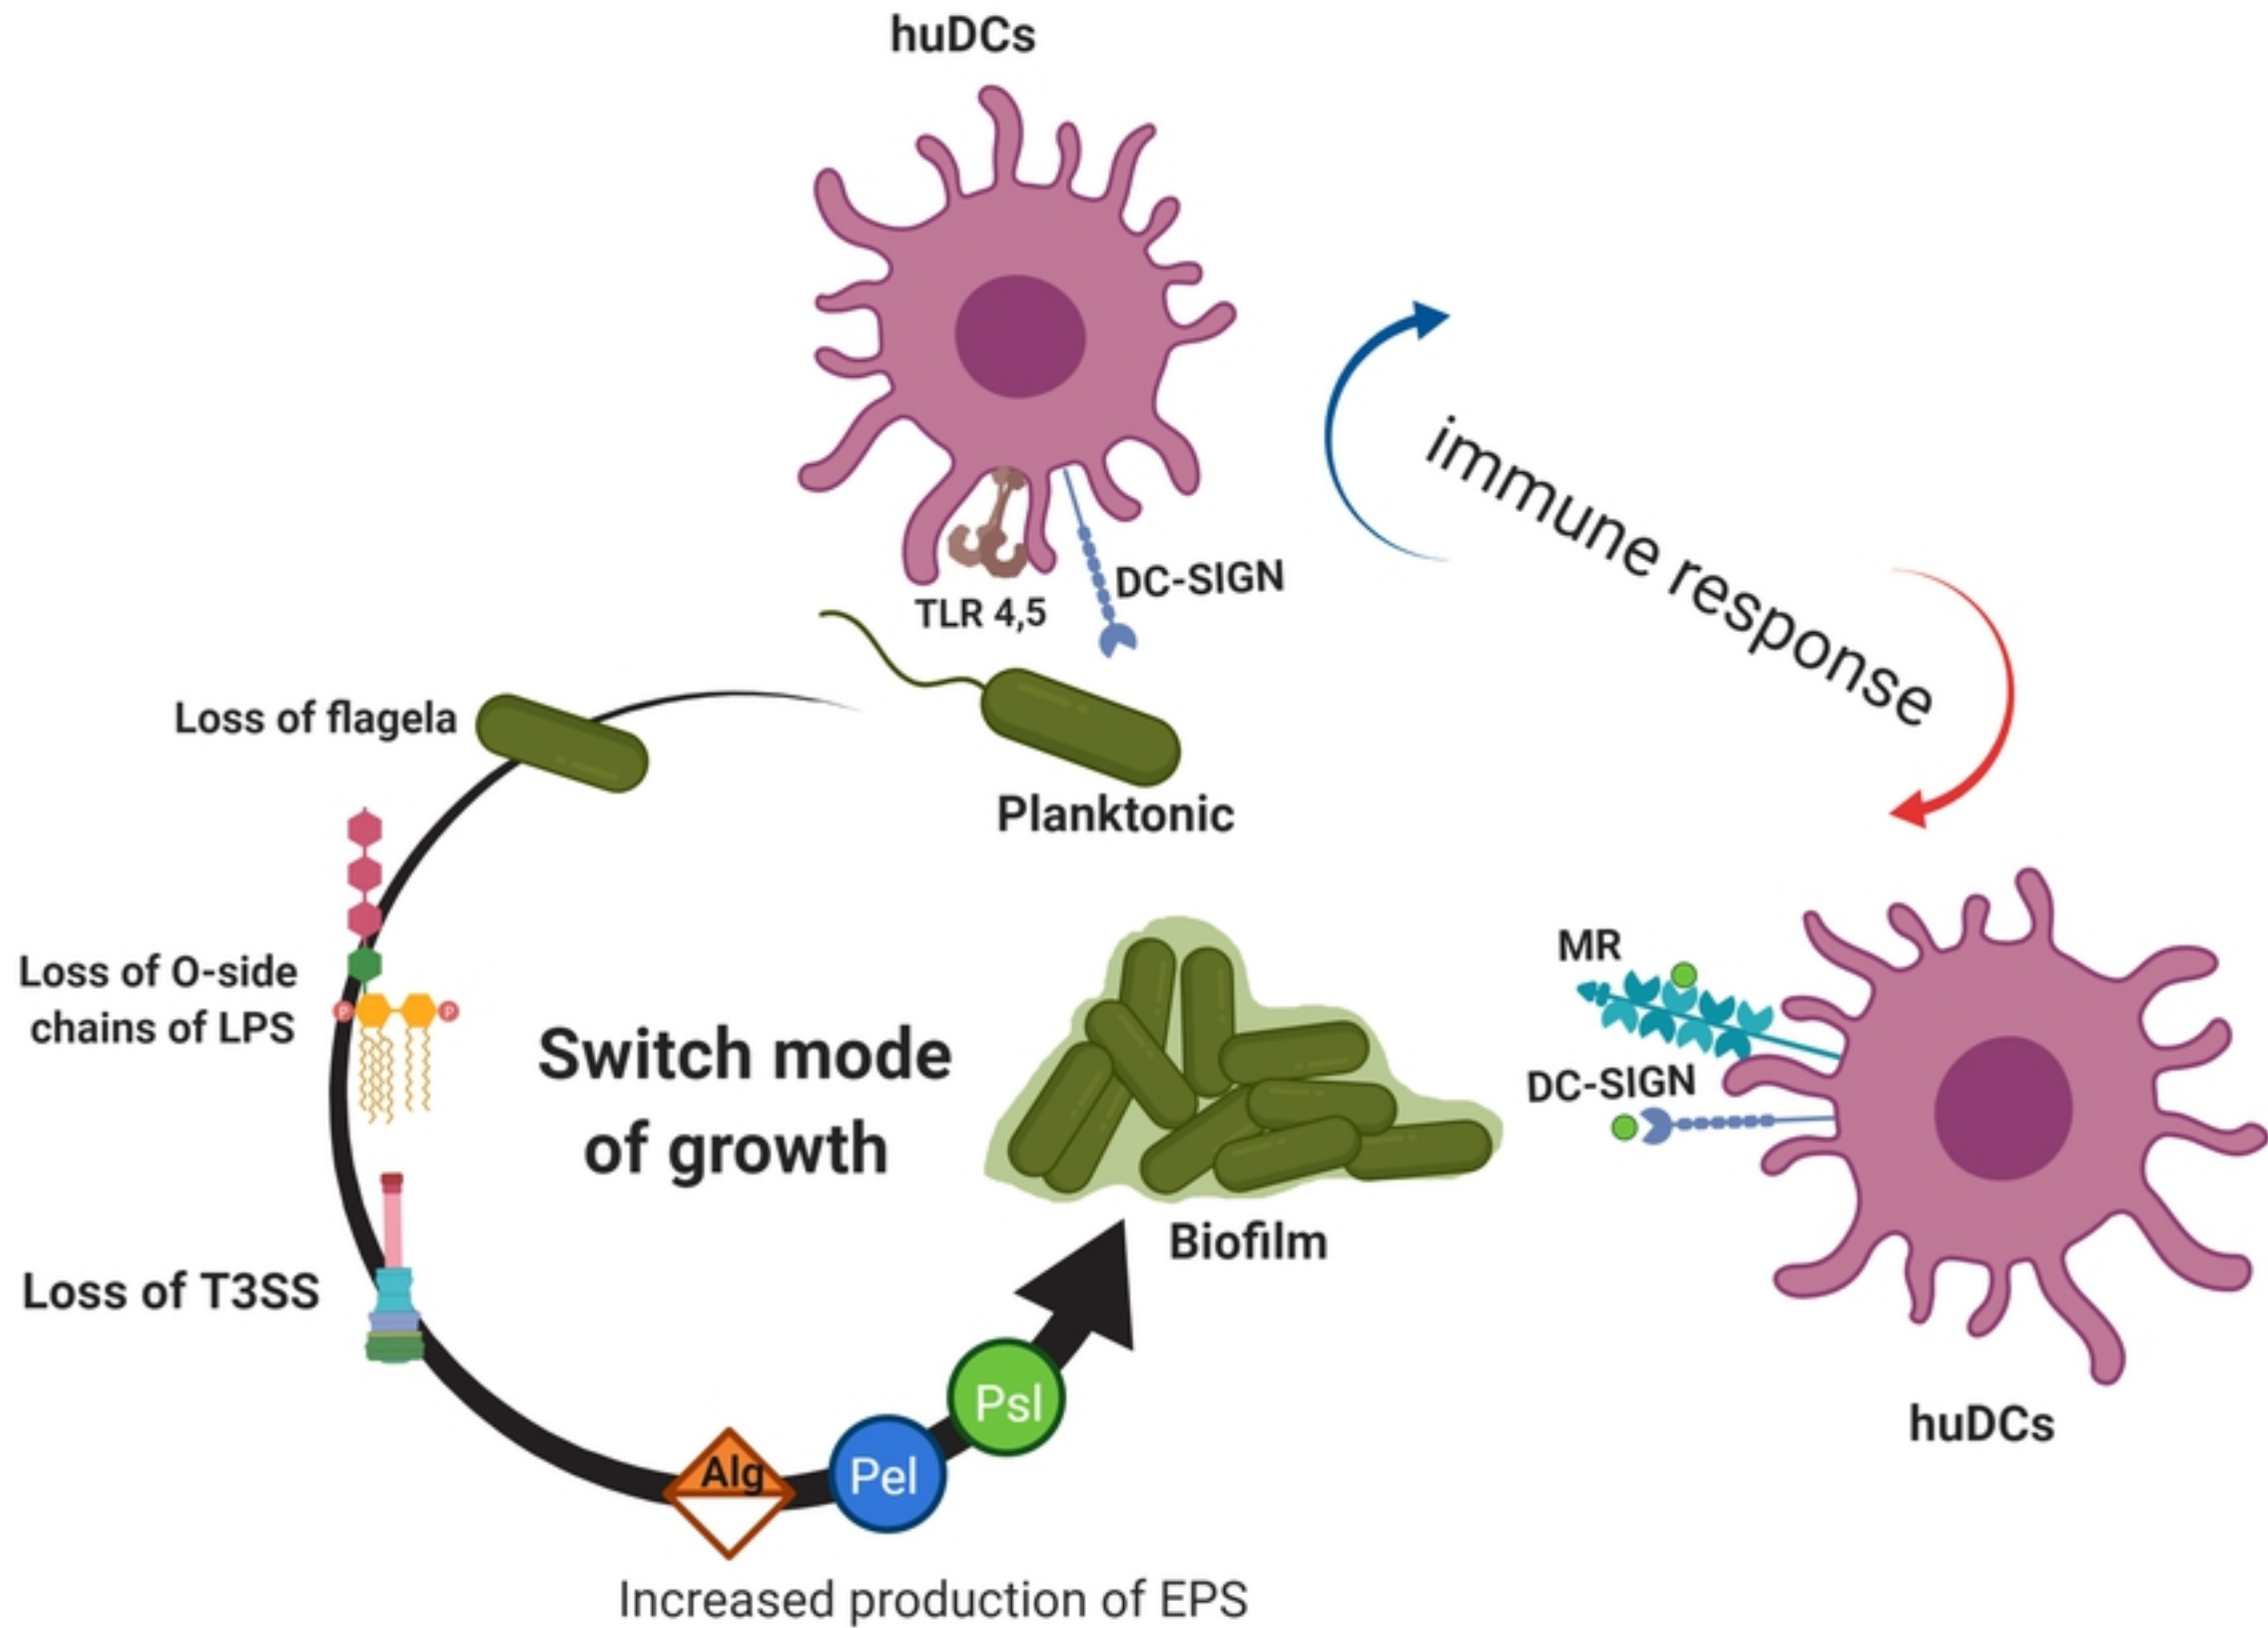

Figure 8
